# Supplementary material for: Individual and household characteristics of persons with Plasmodium falciparum malaria in sites with varying endemicities in Kinshasa Province, Democratic Republic of the Congo
Source: Malar J. 2017 Nov 9;16:456. doi: 10.1186/s12936-017-2110-7 (PMC5680818; doi:10.1186/s12936-017-2110-7)
Supplement: Supplementary file 1 — Additional file 1. Baseline survey. [file 12936_2017_2110_MOESM1_ESM.pdf]

# Baseline Household Questionnaire. (To be completed by the interviewer.)

Date of Visit:  -  -   
 day month year

Endemicity ID (circle one):  01  02  03  04

Village ID:

Household ID:

X Coord:

Y Coord:

## Household characteristics:

1. What is the material used for construction of this house? *Circle all that apply.*

### Roof material:

|                  |    |                    |    |                   |    |            |    |
|------------------|----|--------------------|----|-------------------|----|------------|----|
| No roof          | 00 | Palm leaves/bamboo | 04 | Wood              | 08 | Shingles   | 12 |
| Thatching/leaves | 01 | Wooden planks      | 05 | Zinc/cement fiber | 09 | Other      | 97 |
| Earth clods      | 02 | Cardboard          | 06 | Tiles             | 10 | Don't know | 98 |
| Mats             | 03 | Sheet metal        | 07 | Concrete (cement) | 11 | Refused    | 99 |

If other, please list:

### Outside wall of house:

|                                   |    |                 |    |                         |    |                        |    |
|-----------------------------------|----|-----------------|----|-------------------------|----|------------------------|----|
| No walls                          | 00 | Stones with mud | 04 | Cement                  | 09 | Wooden planks/shingles | 14 |
| Earth                             | 01 | Uncovered adobe | 05 | Stones with cement/lime | 10 | Other                  | 97 |
| Bamboo/cane/<br>palms/tree trunks | 02 | Plywood         | 06 | Bricks                  | 11 | Don't know             | 98 |
|                                   |    | Cardboard       | 07 | Cement blocks           | 12 | Refused                | 99 |
| Bamboo with mud                   | 03 | Reclaimed wood  | 08 | Covered adobe           | 13 |                        |    |

If other, please list:

### Floor material:

|               |    |                       |    |        |    |            |    |
|---------------|----|-----------------------|----|--------|----|------------|----|
| Earth/sand    | 01 | Bamboo/palm leaves    | 04 | Tiles  | 07 | Other      | 97 |
| Dung          | 02 | Parquet/polished wood | 05 | Cement | 08 | Don't know | 98 |
| Wooden planks | 03 | Vinyl strips/asphalt  | 06 | Carpet | 09 | Refused    | 99 |

If other, please list:

### Windows:

|            |    |                      |    |        |    |            |    |
|------------|----|----------------------|----|--------|----|------------|----|
| No windows | 00 | Open                 | 03 | Planks | 05 | Don't know | 98 |
| Glass      | 01 | Plastic paper/carton | 04 | Other  | 97 | Refused    | 99 |
| Screens    | 02 |                      |    |        |    |            |    |

If other, please list:

2. Are there visible holes, cracks, or open eaves in the walls of the house?

|    |    |     |    |            |    |         |    |
|----|----|-----|----|------------|----|---------|----|
| No | 00 | Yes | 01 | Don't know | 98 | Refused | 99 |
|----|----|-----|----|------------|----|---------|----|

3. In this household, do you have (circle all that apply):

|             |    |                                     |    |                   |    |                  |    |
|-------------|----|-------------------------------------|----|-------------------|----|------------------|----|
| Electricity | 01 | A refrigerator                      | 05 | One or more beds  | 08 | A sewing machine | 12 |
| A toilet    | 02 | A gas or electric stove/<br>cooktop | 06 | One or more lamps | 09 | Don't know       | 98 |
| A radio     | 03 |                                     |    | An oven           | 10 | Refused          | 99 |
| A TV        | 04 | A generator                         | 07 | One or more hoes  | 11 |                  |    |

4. Is there someone in this household who has (circle all that apply):

|                                |    |                            |    |             |    |                  |    |
|--------------------------------|----|----------------------------|----|-------------|----|------------------|----|
| A watch                        | 01 | A motorcycle or scooter    | 04 | A motorboat | 07 | A house for rent | 10 |
| A cell phone                   | 02 | A car or truck             | 05 | A bicycle   | 08 | Don't know       | 98 |
| A whaleboat/motorized<br>canoe | 03 | A cart pulled by an animal | 06 | A computer  | 09 | Refused          | 99 |

5. Does someone in your household own cultivable land?

|    |    |     |    |            |    |         |    |
|----|----|-----|----|------------|----|---------|----|
| No | 00 | Yes | 01 | Don't know | 98 | Refused | 99 |
|----|----|-----|----|------------|----|---------|----|

- 5a. If yes, how many hectares of cultivable land do they own?

If 0, enter 00. If ≥95, enter 95. If N/A, enter 96. If don't know, enter 98. If refused, enter 99.

hectares

Interviewer Code:

# Baseline Household Questionnaire. (Continued)

Endemicity-Village-Household ID:

| 01     | 02                                                                                                                                       | 03                                                                                   | 04                        | 05                                      | 06                                | 07                                                                                                                                                                                                             | 08                                                                                                                                                                                     | 09                                                                                              | 10                                                                          | 11                                                               |
|--------|------------------------------------------------------------------------------------------------------------------------------------------|--------------------------------------------------------------------------------------|---------------------------|-----------------------------------------|-----------------------------------|----------------------------------------------------------------------------------------------------------------------------------------------------------------------------------------------------------------|----------------------------------------------------------------------------------------------------------------------------------------------------------------------------------------|-------------------------------------------------------------------------------------------------|-----------------------------------------------------------------------------|------------------------------------------------------------------|
| Line # | List the names of people who usually live in this household and visitors who spent last night here, starting with the head of the house. | What is the relationship of (NAME) to the head of the house?<br><br>See codes below. | Is (NAME) male or female? | Does (NAME) usually live in this house? | Did (NAME) spend last night here? | What age is (NAME)?<br><br>If <5 years, enter age in months.<br><br>Circle years or months for age as appropriate.<br><br>If ≥95 years, enter 95.<br><br>If don't know, enter 98.<br><br>If refused, enter 99. | If age ≥15, what is the marital status of (NAME)?<br><br>00=Never married or lived together<br>01=Married/live together<br>02=Divorced/separated<br>03=Widowed<br>06=N/A<br>99=Refused | If age ≥5, what is the highest level of education (NAME) has completed?<br><br>See codes below. | If age ≥15, what is the usual occupation of (NAME)?<br><br>See codes below. | What religion does (NAME) identify with?<br><br>See codes below. |
| 01     |                                                                                                                                          | <input type="text"/>                                                                 | F M<br>1 0                | Y N<br>1 0                              | Y N<br>1 0                        | <input type="text"/> Years<br><input type="text"/> Months                                                                                                                                                      | <input type="text"/>                                                                                                                                                                   | <input type="text"/>                                                                            | <input type="text"/>                                                        | <input type="text"/>                                             |
| 02     |                                                                                                                                          | <input type="text"/>                                                                 | 1 0                       | 1 0                                     | 1 0                               | <input type="text"/> Years<br><input type="text"/> Months                                                                                                                                                      | <input type="text"/>                                                                                                                                                                   | <input type="text"/>                                                                            | <input type="text"/>                                                        | <input type="text"/>                                             |
| 03     |                                                                                                                                          | <input type="text"/>                                                                 | 1 0                       | 1 0                                     | 1 0                               | <input type="text"/> Years<br><input type="text"/> Months                                                                                                                                                      | <input type="text"/>                                                                                                                                                                   | <input type="text"/>                                                                            | <input type="text"/>                                                        | <input type="text"/>                                             |
| 04     |                                                                                                                                          | <input type="text"/>                                                                 | 1 0                       | 1 0                                     | 1 0                               | <input type="text"/> Years<br><input type="text"/> Months                                                                                                                                                      | <input type="text"/>                                                                                                                                                                   | <input type="text"/>                                                                            | <input type="text"/>                                                        | <input type="text"/>                                             |
| 05     |                                                                                                                                          | <input type="text"/>                                                                 | 1 0                       | 1 0                                     | 1 0                               | <input type="text"/> Years<br><input type="text"/> Months                                                                                                                                                      | <input type="text"/>                                                                                                                                                                   | <input type="text"/>                                                                            | <input type="text"/>                                                        | <input type="text"/>                                             |
| 06     |                                                                                                                                          | <input type="text"/>                                                                 | 1 0                       | 1 0                                     | 1 0                               | <input type="text"/> Years<br><input type="text"/> Months                                                                                                                                                      | <input type="text"/>                                                                                                                                                                   | <input type="text"/>                                                                            | <input type="text"/>                                                        | <input type="text"/>                                             |
| 07     |                                                                                                                                          | <input type="text"/>                                                                 | 1 0                       | 1 0                                     | 1 0                               | <input type="text"/> Years<br><input type="text"/> Months                                                                                                                                                      | <input type="text"/>                                                                                                                                                                   | <input type="text"/>                                                                            | <input type="text"/>                                                        | <input type="text"/>                                             |
| 08     |                                                                                                                                          | <input type="text"/>                                                                 | 1 0                       | 1 0                                     | 1 0                               | <input type="text"/> Years<br><input type="text"/> Months                                                                                                                                                      | <input type="text"/>                                                                                                                                                                   | <input type="text"/>                                                                            | <input type="text"/>                                                        | <input type="text"/>                                             |
| 09     |                                                                                                                                          | <input type="text"/>                                                                 | 1 0                       | 1 0                                     | 1 0                               | <input type="text"/> Years<br><input type="text"/> Months                                                                                                                                                      | <input type="text"/>                                                                                                                                                                   | <input type="text"/>                                                                            | <input type="text"/>                                                        | <input type="text"/>                                             |
| 10     |                                                                                                                                          | <input type="text"/>                                                                 | 1 0                       | 1 0                                     | 1 0                               | <input type="text"/> Years<br><input type="text"/> Months                                                                                                                                                      | <input type="text"/>                                                                                                                                                                   | <input type="text"/>                                                                            | <input type="text"/>                                                        | <input type="text"/>                                             |

## Code for Q3:

00 = Unrelated  
01 = Head of house  
02 = Spouse  
03 = Son or daughter  
04 = Step-son/daughter  
05 = Grandson/daughter  
06 = Father or mother  
07 = In-laws  
08 = Brother or sister  
09 = Nephew or niece  
10 = Nephew/niece by marriage  
11 = Child adopted by/in custody of head of house  
97 = Other  
98 = Don't know  
99 = Refused

## Code for Q9:

00 = No school  
01 = Some primary school  
02 = Primary school certificate  
03 = 1<sup>st</sup> orientation cycle  
04 = 2<sup>nd</sup> orientation cycle  
05 = 3<sup>rd</sup> year secondary school  
06 = 4<sup>th</sup> year secondary school  
07 = 5<sup>th</sup> year secondary school  
08 = 6<sup>th</sup> year secondary school  
09 = 3-year university  
10 = 5-year university  
11 = Doctorate  
96 = N/A  
97 = Other  
98 = Don't know  
99 = Refused

## Code for Q10:

00 = No employment  
01 = State employee  
02 = Soldier or policeman  
03 = Private company employee  
04 = Farmer  
05 = Fisherman  
06 = Driver  
07 = Hotel worker  
08 = Road cleaner  
09 = Market seller  
10 = Boutique owner  
11 = Street vendor  
12 = Money changer  
13 = Artist  
14 = Tailor  
15 = Small personal business  
16 = Student  
96 = N/A  
98 = Don't know

97 = Other  
99 = Refused

## Code for Q11:

00 = None  
01 = Traditional religion  
02 = Catholic  
03 = Evangelical  
04 = The Awakening Church  
05 = Adventist  
06 = Protestant  
07 = Muslim  
97 = Other  
98 = Don't know  
99 = Refused

Interviewer Code: \_\_\_\_\_

# Baseline Household Questionnaire. (Continued)

Endemicity-Village-Household ID:

| 01     | 02                                                                                                                                       | 03                                                                                   | 04                        | 05                                      | 06                                | 07                                                                                                                                                                                                             | 08                                                                                                                                                                                     | 09                                                                                              | 10                                                                          | 11                                                               |
|--------|------------------------------------------------------------------------------------------------------------------------------------------|--------------------------------------------------------------------------------------|---------------------------|-----------------------------------------|-----------------------------------|----------------------------------------------------------------------------------------------------------------------------------------------------------------------------------------------------------------|----------------------------------------------------------------------------------------------------------------------------------------------------------------------------------------|-------------------------------------------------------------------------------------------------|-----------------------------------------------------------------------------|------------------------------------------------------------------|
| Line # | List the names of people who usually live in this household and visitors who spent last night here, starting with the head of the house. | What is the relationship of (NAME) to the head of the house?<br><br>See codes below. | Is (NAME) male or female? | Does (NAME) usually live in this house? | Did (NAME) spend last night here? | What age is (NAME)?<br><br>If <5 years, enter age in months.<br><br>Circle years or months for age as appropriate.<br><br>If ≥95 years, enter 95.<br><br>If don't know, enter 98.<br><br>If refused, enter 99. | If age ≥15, what is the marital status of (NAME)?<br><br>00=Never married or lived together<br>01=Married/live together<br>02=Divorced/separated<br>03=Widowed<br>06=N/A<br>99=Refused | If age ≥5, what is the highest level of education (NAME) has completed?<br><br>See codes below. | If age ≥15, what is the usual occupation of (NAME)?<br><br>See codes below. | What religion does (NAME) identify with?<br><br>See codes below. |
| 11     |                                                                                                                                          | <input type="text"/>                                                                 | F M<br>1 0                | Y N<br>1 0                              | Y N<br>1 0                        | <input type="text"/> Years<br><input type="text"/> Months                                                                                                                                                      | <input type="text"/>                                                                                                                                                                   | <input type="text"/>                                                                            | <input type="text"/>                                                        | <input type="text"/>                                             |
| 12     |                                                                                                                                          | <input type="text"/>                                                                 | 1 0                       | 1 0                                     | 1 0                               | <input type="text"/> Years<br><input type="text"/> Months                                                                                                                                                      | <input type="text"/>                                                                                                                                                                   | <input type="text"/>                                                                            | <input type="text"/>                                                        | <input type="text"/>                                             |
| 13     |                                                                                                                                          | <input type="text"/>                                                                 | 1 0                       | 1 0                                     | 1 0                               | <input type="text"/> Years<br><input type="text"/> Months                                                                                                                                                      | <input type="text"/>                                                                                                                                                                   | <input type="text"/>                                                                            | <input type="text"/>                                                        | <input type="text"/>                                             |
| 14     |                                                                                                                                          | <input type="text"/>                                                                 | 1 0                       | 1 0                                     | 1 0                               | <input type="text"/> Years<br><input type="text"/> Months                                                                                                                                                      | <input type="text"/>                                                                                                                                                                   | <input type="text"/>                                                                            | <input type="text"/>                                                        | <input type="text"/>                                             |
| 15     |                                                                                                                                          | <input type="text"/>                                                                 | 1 0                       | 1 0                                     | 1 0                               | <input type="text"/> Years<br><input type="text"/> Months                                                                                                                                                      | <input type="text"/>                                                                                                                                                                   | <input type="text"/>                                                                            | <input type="text"/>                                                        | <input type="text"/>                                             |
| 16     |                                                                                                                                          | <input type="text"/>                                                                 | 1 0                       | 1 0                                     | 1 0                               | <input type="text"/> Years<br><input type="text"/> Months                                                                                                                                                      | <input type="text"/>                                                                                                                                                                   | <input type="text"/>                                                                            | <input type="text"/>                                                        | <input type="text"/>                                             |
| 17     |                                                                                                                                          | <input type="text"/>                                                                 | 1 0                       | 1 0                                     | 1 0                               | <input type="text"/> Years<br><input type="text"/> Months                                                                                                                                                      | <input type="text"/>                                                                                                                                                                   | <input type="text"/>                                                                            | <input type="text"/>                                                        | <input type="text"/>                                             |
| 18     |                                                                                                                                          | <input type="text"/>                                                                 | 1 0                       | 1 0                                     | 1 0                               | <input type="text"/> Years<br><input type="text"/> Months                                                                                                                                                      | <input type="text"/>                                                                                                                                                                   | <input type="text"/>                                                                            | <input type="text"/>                                                        | <input type="text"/>                                             |
| 19     |                                                                                                                                          | <input type="text"/>                                                                 | 1 0                       | 1 0                                     | 1 0                               | <input type="text"/> Years<br><input type="text"/> Months                                                                                                                                                      | <input type="text"/>                                                                                                                                                                   | <input type="text"/>                                                                            | <input type="text"/>                                                        | <input type="text"/>                                             |
| 20     |                                                                                                                                          | <input type="text"/>                                                                 | 1 0                       | 1 0                                     | 1 0                               | <input type="text"/> Years<br><input type="text"/> Months                                                                                                                                                      | <input type="text"/>                                                                                                                                                                   | <input type="text"/>                                                                            | <input type="text"/>                                                        | <input type="text"/>                                             |

## Code for Q3:

00 = Unrelated  
01 = Head of house  
02 = Spouse  
03 = Son or daughter  
04 = Step-son/daughter  
05 = Grandson/daughter  
06 = Father or mother  
07 = In-laws  
08 = Brother or sister  
09 = Nephew or niece  
10 = Nephew/niece by marriage  
11 = Child adopted by/in custody of head of house  
97 = Other  
98 = Don't know  
99 = Refused

## Code for Q9:

00 = No school  
01 = Some primary school  
02 = Primary school certificate  
03 = 1<sup>st</sup> orientation cycle  
04 = 2<sup>nd</sup> orientation cycle  
05 = 3<sup>rd</sup> year secondary school  
06 = 4<sup>th</sup> year secondary school  
07 = 5<sup>th</sup> year secondary school  
08 = 6<sup>th</sup> year secondary school  
09 = 3-year university  
10 = 5-year university  
11 = Doctorate  
96 = N/A  
97 = Other  
98 = Don't know  
99 = Refused

## Code for Q10:

00 = No employment  
01 = State employee  
02 = Soldier or policeman  
03 = Private company employee  
04 = Farmer  
05 = Fisherman  
06 = Driver  
07 = Hotel worker  
08 = Road cleaner  
09 = Market seller  
10 = Boutique owner  
11 = Street vendor  
12 = Money changer  
13 = Artist  
14 = Tailor  
15 = Small personal business  
16 = Student  
96 = N/A  
98 = Don't know

97 = Other  
99 = Refused

## Code for Q11:

00 = None  
01 = Traditional religion  
02 = Catholic  
03 = Evangelical  
04 = The Awakening Church  
05 = Adventist  
06 = Protestant  
07 = Muslim  
97 = Other  
98 = Don't know  
99 = Refused

Interviewer Code: \_\_\_\_\_

**Baseline Household Questionnaire. (Continued)**

Endemicity-Village-Household ID:

|  |  |  |  |  |  |
|--|--|--|--|--|--|
|  |  |  |  |  |  |
|--|--|--|--|--|--|

6. Is there water within a two-minute walk from your house?

|    |    |     |    |            |    |         |    |
|----|----|-----|----|------------|----|---------|----|
| No | 00 | Yes | 01 | Don't know | 98 | Refused | 99 |
|----|----|-----|----|------------|----|---------|----|

6a. If yes, what type of water is it?

|        |    |           |    |                 |    |                     |    |     |    |       |    |            |    |         |    |
|--------|----|-----------|----|-----------------|----|---------------------|----|-----|----|-------|----|------------|----|---------|----|
| Stream | 01 | Pond/lake | 02 | Swamp/<br>marsh | 03 | Frequent<br>puddles | 04 | N/A | 96 | Other | 97 | Don't know | 98 | Refused | 99 |
|--------|----|-----------|----|-----------------|----|---------------------|----|-----|----|-------|----|------------|----|---------|----|

*If other, please list:* \_\_\_\_\_

7. Does your household have mosquito nets for sleeping?

|    |    |     |    |            |    |         |    |
|----|----|-----|----|------------|----|---------|----|
| No | 00 | Yes | 01 | Don't know | 98 | Refused | 99 |
|----|----|-----|----|------------|----|---------|----|

6a. If yes, how many mosquito nets do you have in your house?

|  |  |
|--|--|
|  |  |
|--|--|

 nets*If  $\geq 7$ , enter 07.**If N/A, enter 96.**If don't know, enter 98.**If refused, enter 99.***IF HOUSEHOLD DOES NOT HAVE MOSQUITO NETS FOR SLEEPING: skip to page 7.**

Interviewer Code: \_\_\_\_\_

# Baseline Household Questionnaire. (Continued)

Endemicity-Village-Household ID:

| #        | Bed Net Questions                                                                                                                                 | Net #1                                                                                                                                                                                                                                                                                                                                                                                                                                                                                                                                              | Net #2                                                                                                                                                          | Net #3                                                                                                                                                          |          |                               |                      |                               |          |                               |                      |                               |                                                                                                                                                                                                                                                                                                                                                                                   |                      |                               |                      |                               |          |                               |                      |                                                                                                                                                                                                                                                                                                                                                                                                                                                                                                                                                     |          |                               |                                                                                                                                                                                                                                                                                                                                                                                   |          |                               |                      |                               |                      |                               |          |                               |                      |                               |                      |                      |          |                      |                      |                                                                                                                                                                                                                                                                                                                                                                                                                                                                                                                                                     |  |      |     |          |                      |                      |          |                      |                      |          |                      |                      |          |                      |                      |          |                      |                      |
|----------|---------------------------------------------------------------------------------------------------------------------------------------------------|-----------------------------------------------------------------------------------------------------------------------------------------------------------------------------------------------------------------------------------------------------------------------------------------------------------------------------------------------------------------------------------------------------------------------------------------------------------------------------------------------------------------------------------------------------|-----------------------------------------------------------------------------------------------------------------------------------------------------------------|-----------------------------------------------------------------------------------------------------------------------------------------------------------------|----------|-------------------------------|----------------------|-------------------------------|----------|-------------------------------|----------------------|-------------------------------|-----------------------------------------------------------------------------------------------------------------------------------------------------------------------------------------------------------------------------------------------------------------------------------------------------------------------------------------------------------------------------------|----------------------|-------------------------------|----------------------|-------------------------------|----------|-------------------------------|----------------------|-----------------------------------------------------------------------------------------------------------------------------------------------------------------------------------------------------------------------------------------------------------------------------------------------------------------------------------------------------------------------------------------------------------------------------------------------------------------------------------------------------------------------------------------------------|----------|-------------------------------|-----------------------------------------------------------------------------------------------------------------------------------------------------------------------------------------------------------------------------------------------------------------------------------------------------------------------------------------------------------------------------------|----------|-------------------------------|----------------------|-------------------------------|----------------------|-------------------------------|----------|-------------------------------|----------------------|-------------------------------|----------------------|----------------------|----------|----------------------|----------------------|-----------------------------------------------------------------------------------------------------------------------------------------------------------------------------------------------------------------------------------------------------------------------------------------------------------------------------------------------------------------------------------------------------------------------------------------------------------------------------------------------------------------------------------------------------|--|------|-----|----------|----------------------|----------------------|----------|----------------------|----------------------|----------|----------------------|----------------------|----------|----------------------|----------------------|----------|----------------------|----------------------|
| 01       | INTERVIEWER RESPONDS:<br>Did you observe this net?                                                                                                | Observed 01<br>Not observed 00                                                                                                                                                                                                                                                                                                                                                                                                                                                                                                                      | Observed 01<br>Not observed 00                                                                                                                                  | Observed 01<br>Not observed 00                                                                                                                                  |          |                               |                      |                               |          |                               |                      |                               |                                                                                                                                                                                                                                                                                                                                                                                   |                      |                               |                      |                               |          |                               |                      |                                                                                                                                                                                                                                                                                                                                                                                                                                                                                                                                                     |          |                               |                                                                                                                                                                                                                                                                                                                                                                                   |          |                               |                      |                               |                      |                               |          |                               |                      |                               |                      |                      |          |                      |                      |                                                                                                                                                                                                                                                                                                                                                                                                                                                                                                                                                     |  |      |     |          |                      |                      |          |                      |                      |          |                      |                      |          |                      |                      |          |                      |                      |
| 02       | INTERVIEWER RESPONDS:<br>Are there holes in this net?                                                                                             | Yes 01<br>No 00<br>N/A 96                                                                                                                                                                                                                                                                                                                                                                                                                                                                                                                           | Yes 01<br>No 00<br>N/A 96                                                                                                                                       | Yes 01<br>No 00<br>N/A 96                                                                                                                                       |          |                               |                      |                               |          |                               |                      |                               |                                                                                                                                                                                                                                                                                                                                                                                   |                      |                               |                      |                               |          |                               |                      |                                                                                                                                                                                                                                                                                                                                                                                                                                                                                                                                                     |          |                               |                                                                                                                                                                                                                                                                                                                                                                                   |          |                               |                      |                               |                      |                               |          |                               |                      |                               |                      |                      |          |                      |                      |                                                                                                                                                                                                                                                                                                                                                                                                                                                                                                                                                     |  |      |     |          |                      |                      |          |                      |                      |          |                      |                      |          |                      |                      |          |                      |                      |
| 03       | INTERVIEWER RESPONDS:<br>Is this net correctly installed?                                                                                         | Yes 01<br>No 00<br>N/A 96                                                                                                                                                                                                                                                                                                                                                                                                                                                                                                                           | Yes 01<br>No 00<br>N/A 96                                                                                                                                       | Yes 01<br>No 00<br>N/A 96                                                                                                                                       |          |                               |                      |                               |          |                               |                      |                               |                                                                                                                                                                                                                                                                                                                                                                                   |                      |                               |                      |                               |          |                               |                      |                                                                                                                                                                                                                                                                                                                                                                                                                                                                                                                                                     |          |                               |                                                                                                                                                                                                                                                                                                                                                                                   |          |                               |                      |                               |                      |                               |          |                               |                      |                               |                      |                      |          |                      |                      |                                                                                                                                                                                                                                                                                                                                                                                                                                                                                                                                                     |  |      |     |          |                      |                      |          |                      |                      |          |                      |                      |          |                      |                      |          |                      |                      |
| 04       | How many months have you had this net?<br>If <1 month, enter 00.<br>If >36 months, enter 95.<br>If don't know, enter 98.<br>If refused, enter 99. | <input type="text"/> <input type="text"/> months                                                                                                                                                                                                                                                                                                                                                                                                                                                                                                    | <input type="text"/> <input type="text"/> months                                                                                                                | <input type="text"/> <input type="text"/> months                                                                                                                |          |                               |                      |                               |          |                               |                      |                               |                                                                                                                                                                                                                                                                                                                                                                                   |                      |                               |                      |                               |          |                               |                      |                                                                                                                                                                                                                                                                                                                                                                                                                                                                                                                                                     |          |                               |                                                                                                                                                                                                                                                                                                                                                                                   |          |                               |                      |                               |                      |                               |          |                               |                      |                               |                      |                      |          |                      |                      |                                                                                                                                                                                                                                                                                                                                                                                                                                                                                                                                                     |  |      |     |          |                      |                      |          |                      |                      |          |                      |                      |          |                      |                      |          |                      |                      |
| 05       | Where did you get this net?                                                                                                                       | Purchased at market 01<br>Mass distribution 02<br>Antenatal clinic 03<br>Hospital 04<br>N/A 96<br>Other 97<br>Please list: _____<br>Don't know 98<br>Refused 99                                                                                                                                                                                                                                                                                                                                                                                     | Purchased at market 01<br>Mass distribution 02<br>Antenatal clinic 03<br>Hospital 04<br>N/A 96<br>Other 97<br>Please list: _____<br>Don't know 98<br>Refused 99 | Purchased at market 01<br>Mass distribution 02<br>Antenatal clinic 03<br>Hospital 04<br>N/A 96<br>Other 97<br>Please list: _____<br>Don't know 98<br>Refused 99 |          |                               |                      |                               |          |                               |                      |                               |                                                                                                                                                                                                                                                                                                                                                                                   |                      |                               |                      |                               |          |                               |                      |                                                                                                                                                                                                                                                                                                                                                                                                                                                                                                                                                     |          |                               |                                                                                                                                                                                                                                                                                                                                                                                   |          |                               |                      |                               |                      |                               |          |                               |                      |                               |                      |                      |          |                      |                      |                                                                                                                                                                                                                                                                                                                                                                                                                                                                                                                                                     |  |      |     |          |                      |                      |          |                      |                      |          |                      |                      |          |                      |                      |          |                      |                      |
| 06       | Did someone sleep under this net last night?<br><b>IF NO: return to Question 1 for the next net or skip to page 7 if this is the last net.</b>    | Yes 01<br>No 00<br>N/A 96<br>Don't know 98<br>Refused 99                                                                                                                                                                                                                                                                                                                                                                                                                                                                                            | Yes 01<br>No 00<br>N/A 96<br>Don't know 98<br>Refused 99                                                                                                        | Yes 01<br>No 00<br>N/A 96<br>Don't know 98<br>Refused 99                                                                                                        |          |                               |                      |                               |          |                               |                      |                               |                                                                                                                                                                                                                                                                                                                                                                                   |                      |                               |                      |                               |          |                               |                      |                                                                                                                                                                                                                                                                                                                                                                                                                                                                                                                                                     |          |                               |                                                                                                                                                                                                                                                                                                                                                                                   |          |                               |                      |                               |                      |                               |          |                               |                      |                               |                      |                      |          |                      |                      |                                                                                                                                                                                                                                                                                                                                                                                                                                                                                                                                                     |  |      |     |          |                      |                      |          |                      |                      |          |                      |                      |          |                      |                      |          |                      |                      |
| 06a      | If yes to Question 6: who slept under this net?<br>Enter the name and age of each person.                                                         | <table border="1"> <thead> <tr> <th></th><th>Name</th><th>Age</th></tr> </thead> <tbody> <tr><td>Person 1</td><td><input type="text"/></td><td><input type="text"/></td></tr> <tr><td>Person 2</td><td><input type="text"/></td><td><input type="text"/></td></tr> <tr><td>Person 3</td><td><input type="text"/></td><td><input type="text"/></td></tr> <tr><td>Person 4</td><td><input type="text"/></td><td><input type="text"/></td></tr> <tr><td>Person 5</td><td><input type="text"/></td><td><input type="text"/></td></tr> </tbody> </table> |                                                                                                                                                                 | Name                                                                                                                                                            | Age      | Person 1                      | <input type="text"/> | <input type="text"/>          | Person 2 | <input type="text"/>          | <input type="text"/> | Person 3                      | <input type="text"/>                                                                                                                                                                                                                                                                                                                                                              | <input type="text"/> | Person 4                      | <input type="text"/> | <input type="text"/>          | Person 5 | <input type="text"/>          | <input type="text"/> | <table border="1"> <thead> <tr> <th></th><th>Name</th><th>Age</th></tr> </thead> <tbody> <tr><td>Person 1</td><td><input type="text"/></td><td><input type="text"/></td></tr> <tr><td>Person 2</td><td><input type="text"/></td><td><input type="text"/></td></tr> <tr><td>Person 3</td><td><input type="text"/></td><td><input type="text"/></td></tr> <tr><td>Person 4</td><td><input type="text"/></td><td><input type="text"/></td></tr> <tr><td>Person 5</td><td><input type="text"/></td><td><input type="text"/></td></tr> </tbody> </table> |          | Name                          | Age                                                                                                                                                                                                                                                                                                                                                                               | Person 1 | <input type="text"/>          | <input type="text"/> | Person 2                      | <input type="text"/> | <input type="text"/>          | Person 3 | <input type="text"/>          | <input type="text"/> | Person 4                      | <input type="text"/> | <input type="text"/> | Person 5 | <input type="text"/> | <input type="text"/> | <table border="1"> <thead> <tr> <th></th><th>Name</th><th>Age</th></tr> </thead> <tbody> <tr><td>Person 1</td><td><input type="text"/></td><td><input type="text"/></td></tr> <tr><td>Person 2</td><td><input type="text"/></td><td><input type="text"/></td></tr> <tr><td>Person 3</td><td><input type="text"/></td><td><input type="text"/></td></tr> <tr><td>Person 4</td><td><input type="text"/></td><td><input type="text"/></td></tr> <tr><td>Person 5</td><td><input type="text"/></td><td><input type="text"/></td></tr> </tbody> </table> |  | Name | Age | Person 1 | <input type="text"/> | <input type="text"/> | Person 2 | <input type="text"/> | <input type="text"/> | Person 3 | <input type="text"/> | <input type="text"/> | Person 4 | <input type="text"/> | <input type="text"/> | Person 5 | <input type="text"/> | <input type="text"/> |
|          | Name                                                                                                                                              | Age                                                                                                                                                                                                                                                                                                                                                                                                                                                                                                                                                 |                                                                                                                                                                 |                                                                                                                                                                 |          |                               |                      |                               |          |                               |                      |                               |                                                                                                                                                                                                                                                                                                                                                                                   |                      |                               |                      |                               |          |                               |                      |                                                                                                                                                                                                                                                                                                                                                                                                                                                                                                                                                     |          |                               |                                                                                                                                                                                                                                                                                                                                                                                   |          |                               |                      |                               |                      |                               |          |                               |                      |                               |                      |                      |          |                      |                      |                                                                                                                                                                                                                                                                                                                                                                                                                                                                                                                                                     |  |      |     |          |                      |                      |          |                      |                      |          |                      |                      |          |                      |                      |          |                      |                      |
| Person 1 | <input type="text"/>                                                                                                                              | <input type="text"/>                                                                                                                                                                                                                                                                                                                                                                                                                                                                                                                                |                                                                                                                                                                 |                                                                                                                                                                 |          |                               |                      |                               |          |                               |                      |                               |                                                                                                                                                                                                                                                                                                                                                                                   |                      |                               |                      |                               |          |                               |                      |                                                                                                                                                                                                                                                                                                                                                                                                                                                                                                                                                     |          |                               |                                                                                                                                                                                                                                                                                                                                                                                   |          |                               |                      |                               |                      |                               |          |                               |                      |                               |                      |                      |          |                      |                      |                                                                                                                                                                                                                                                                                                                                                                                                                                                                                                                                                     |  |      |     |          |                      |                      |          |                      |                      |          |                      |                      |          |                      |                      |          |                      |                      |
| Person 2 | <input type="text"/>                                                                                                                              | <input type="text"/>                                                                                                                                                                                                                                                                                                                                                                                                                                                                                                                                |                                                                                                                                                                 |                                                                                                                                                                 |          |                               |                      |                               |          |                               |                      |                               |                                                                                                                                                                                                                                                                                                                                                                                   |                      |                               |                      |                               |          |                               |                      |                                                                                                                                                                                                                                                                                                                                                                                                                                                                                                                                                     |          |                               |                                                                                                                                                                                                                                                                                                                                                                                   |          |                               |                      |                               |                      |                               |          |                               |                      |                               |                      |                      |          |                      |                      |                                                                                                                                                                                                                                                                                                                                                                                                                                                                                                                                                     |  |      |     |          |                      |                      |          |                      |                      |          |                      |                      |          |                      |                      |          |                      |                      |
| Person 3 | <input type="text"/>                                                                                                                              | <input type="text"/>                                                                                                                                                                                                                                                                                                                                                                                                                                                                                                                                |                                                                                                                                                                 |                                                                                                                                                                 |          |                               |                      |                               |          |                               |                      |                               |                                                                                                                                                                                                                                                                                                                                                                                   |                      |                               |                      |                               |          |                               |                      |                                                                                                                                                                                                                                                                                                                                                                                                                                                                                                                                                     |          |                               |                                                                                                                                                                                                                                                                                                                                                                                   |          |                               |                      |                               |                      |                               |          |                               |                      |                               |                      |                      |          |                      |                      |                                                                                                                                                                                                                                                                                                                                                                                                                                                                                                                                                     |  |      |     |          |                      |                      |          |                      |                      |          |                      |                      |          |                      |                      |          |                      |                      |
| Person 4 | <input type="text"/>                                                                                                                              | <input type="text"/>                                                                                                                                                                                                                                                                                                                                                                                                                                                                                                                                |                                                                                                                                                                 |                                                                                                                                                                 |          |                               |                      |                               |          |                               |                      |                               |                                                                                                                                                                                                                                                                                                                                                                                   |                      |                               |                      |                               |          |                               |                      |                                                                                                                                                                                                                                                                                                                                                                                                                                                                                                                                                     |          |                               |                                                                                                                                                                                                                                                                                                                                                                                   |          |                               |                      |                               |                      |                               |          |                               |                      |                               |                      |                      |          |                      |                      |                                                                                                                                                                                                                                                                                                                                                                                                                                                                                                                                                     |  |      |     |          |                      |                      |          |                      |                      |          |                      |                      |          |                      |                      |          |                      |                      |
| Person 5 | <input type="text"/>                                                                                                                              | <input type="text"/>                                                                                                                                                                                                                                                                                                                                                                                                                                                                                                                                |                                                                                                                                                                 |                                                                                                                                                                 |          |                               |                      |                               |          |                               |                      |                               |                                                                                                                                                                                                                                                                                                                                                                                   |                      |                               |                      |                               |          |                               |                      |                                                                                                                                                                                                                                                                                                                                                                                                                                                                                                                                                     |          |                               |                                                                                                                                                                                                                                                                                                                                                                                   |          |                               |                      |                               |                      |                               |          |                               |                      |                               |                      |                      |          |                      |                      |                                                                                                                                                                                                                                                                                                                                                                                                                                                                                                                                                     |  |      |     |          |                      |                      |          |                      |                      |          |                      |                      |          |                      |                      |          |                      |                      |
|          | Name                                                                                                                                              | Age                                                                                                                                                                                                                                                                                                                                                                                                                                                                                                                                                 |                                                                                                                                                                 |                                                                                                                                                                 |          |                               |                      |                               |          |                               |                      |                               |                                                                                                                                                                                                                                                                                                                                                                                   |                      |                               |                      |                               |          |                               |                      |                                                                                                                                                                                                                                                                                                                                                                                                                                                                                                                                                     |          |                               |                                                                                                                                                                                                                                                                                                                                                                                   |          |                               |                      |                               |                      |                               |          |                               |                      |                               |                      |                      |          |                      |                      |                                                                                                                                                                                                                                                                                                                                                                                                                                                                                                                                                     |  |      |     |          |                      |                      |          |                      |                      |          |                      |                      |          |                      |                      |          |                      |                      |
| Person 1 | <input type="text"/>                                                                                                                              | <input type="text"/>                                                                                                                                                                                                                                                                                                                                                                                                                                                                                                                                |                                                                                                                                                                 |                                                                                                                                                                 |          |                               |                      |                               |          |                               |                      |                               |                                                                                                                                                                                                                                                                                                                                                                                   |                      |                               |                      |                               |          |                               |                      |                                                                                                                                                                                                                                                                                                                                                                                                                                                                                                                                                     |          |                               |                                                                                                                                                                                                                                                                                                                                                                                   |          |                               |                      |                               |                      |                               |          |                               |                      |                               |                      |                      |          |                      |                      |                                                                                                                                                                                                                                                                                                                                                                                                                                                                                                                                                     |  |      |     |          |                      |                      |          |                      |                      |          |                      |                      |          |                      |                      |          |                      |                      |
| Person 2 | <input type="text"/>                                                                                                                              | <input type="text"/>                                                                                                                                                                                                                                                                                                                                                                                                                                                                                                                                |                                                                                                                                                                 |                                                                                                                                                                 |          |                               |                      |                               |          |                               |                      |                               |                                                                                                                                                                                                                                                                                                                                                                                   |                      |                               |                      |                               |          |                               |                      |                                                                                                                                                                                                                                                                                                                                                                                                                                                                                                                                                     |          |                               |                                                                                                                                                                                                                                                                                                                                                                                   |          |                               |                      |                               |                      |                               |          |                               |                      |                               |                      |                      |          |                      |                      |                                                                                                                                                                                                                                                                                                                                                                                                                                                                                                                                                     |  |      |     |          |                      |                      |          |                      |                      |          |                      |                      |          |                      |                      |          |                      |                      |
| Person 3 | <input type="text"/>                                                                                                                              | <input type="text"/>                                                                                                                                                                                                                                                                                                                                                                                                                                                                                                                                |                                                                                                                                                                 |                                                                                                                                                                 |          |                               |                      |                               |          |                               |                      |                               |                                                                                                                                                                                                                                                                                                                                                                                   |                      |                               |                      |                               |          |                               |                      |                                                                                                                                                                                                                                                                                                                                                                                                                                                                                                                                                     |          |                               |                                                                                                                                                                                                                                                                                                                                                                                   |          |                               |                      |                               |                      |                               |          |                               |                      |                               |                      |                      |          |                      |                      |                                                                                                                                                                                                                                                                                                                                                                                                                                                                                                                                                     |  |      |     |          |                      |                      |          |                      |                      |          |                      |                      |          |                      |                      |          |                      |                      |
| Person 4 | <input type="text"/>                                                                                                                              | <input type="text"/>                                                                                                                                                                                                                                                                                                                                                                                                                                                                                                                                |                                                                                                                                                                 |                                                                                                                                                                 |          |                               |                      |                               |          |                               |                      |                               |                                                                                                                                                                                                                                                                                                                                                                                   |                      |                               |                      |                               |          |                               |                      |                                                                                                                                                                                                                                                                                                                                                                                                                                                                                                                                                     |          |                               |                                                                                                                                                                                                                                                                                                                                                                                   |          |                               |                      |                               |                      |                               |          |                               |                      |                               |                      |                      |          |                      |                      |                                                                                                                                                                                                                                                                                                                                                                                                                                                                                                                                                     |  |      |     |          |                      |                      |          |                      |                      |          |                      |                      |          |                      |                      |          |                      |                      |
| Person 5 | <input type="text"/>                                                                                                                              | <input type="text"/>                                                                                                                                                                                                                                                                                                                                                                                                                                                                                                                                |                                                                                                                                                                 |                                                                                                                                                                 |          |                               |                      |                               |          |                               |                      |                               |                                                                                                                                                                                                                                                                                                                                                                                   |                      |                               |                      |                               |          |                               |                      |                                                                                                                                                                                                                                                                                                                                                                                                                                                                                                                                                     |          |                               |                                                                                                                                                                                                                                                                                                                                                                                   |          |                               |                      |                               |                      |                               |          |                               |                      |                               |                      |                      |          |                      |                      |                                                                                                                                                                                                                                                                                                                                                                                                                                                                                                                                                     |  |      |     |          |                      |                      |          |                      |                      |          |                      |                      |          |                      |                      |          |                      |                      |
|          | Name                                                                                                                                              | Age                                                                                                                                                                                                                                                                                                                                                                                                                                                                                                                                                 |                                                                                                                                                                 |                                                                                                                                                                 |          |                               |                      |                               |          |                               |                      |                               |                                                                                                                                                                                                                                                                                                                                                                                   |                      |                               |                      |                               |          |                               |                      |                                                                                                                                                                                                                                                                                                                                                                                                                                                                                                                                                     |          |                               |                                                                                                                                                                                                                                                                                                                                                                                   |          |                               |                      |                               |                      |                               |          |                               |                      |                               |                      |                      |          |                      |                      |                                                                                                                                                                                                                                                                                                                                                                                                                                                                                                                                                     |  |      |     |          |                      |                      |          |                      |                      |          |                      |                      |          |                      |                      |          |                      |                      |
| Person 1 | <input type="text"/>                                                                                                                              | <input type="text"/>                                                                                                                                                                                                                                                                                                                                                                                                                                                                                                                                |                                                                                                                                                                 |                                                                                                                                                                 |          |                               |                      |                               |          |                               |                      |                               |                                                                                                                                                                                                                                                                                                                                                                                   |                      |                               |                      |                               |          |                               |                      |                                                                                                                                                                                                                                                                                                                                                                                                                                                                                                                                                     |          |                               |                                                                                                                                                                                                                                                                                                                                                                                   |          |                               |                      |                               |                      |                               |          |                               |                      |                               |                      |                      |          |                      |                      |                                                                                                                                                                                                                                                                                                                                                                                                                                                                                                                                                     |  |      |     |          |                      |                      |          |                      |                      |          |                      |                      |          |                      |                      |          |                      |                      |
| Person 2 | <input type="text"/>                                                                                                                              | <input type="text"/>                                                                                                                                                                                                                                                                                                                                                                                                                                                                                                                                |                                                                                                                                                                 |                                                                                                                                                                 |          |                               |                      |                               |          |                               |                      |                               |                                                                                                                                                                                                                                                                                                                                                                                   |                      |                               |                      |                               |          |                               |                      |                                                                                                                                                                                                                                                                                                                                                                                                                                                                                                                                                     |          |                               |                                                                                                                                                                                                                                                                                                                                                                                   |          |                               |                      |                               |                      |                               |          |                               |                      |                               |                      |                      |          |                      |                      |                                                                                                                                                                                                                                                                                                                                                                                                                                                                                                                                                     |  |      |     |          |                      |                      |          |                      |                      |          |                      |                      |          |                      |                      |          |                      |                      |
| Person 3 | <input type="text"/>                                                                                                                              | <input type="text"/>                                                                                                                                                                                                                                                                                                                                                                                                                                                                                                                                |                                                                                                                                                                 |                                                                                                                                                                 |          |                               |                      |                               |          |                               |                      |                               |                                                                                                                                                                                                                                                                                                                                                                                   |                      |                               |                      |                               |          |                               |                      |                                                                                                                                                                                                                                                                                                                                                                                                                                                                                                                                                     |          |                               |                                                                                                                                                                                                                                                                                                                                                                                   |          |                               |                      |                               |                      |                               |          |                               |                      |                               |                      |                      |          |                      |                      |                                                                                                                                                                                                                                                                                                                                                                                                                                                                                                                                                     |  |      |     |          |                      |                      |          |                      |                      |          |                      |                      |          |                      |                      |          |                      |                      |
| Person 4 | <input type="text"/>                                                                                                                              | <input type="text"/>                                                                                                                                                                                                                                                                                                                                                                                                                                                                                                                                |                                                                                                                                                                 |                                                                                                                                                                 |          |                               |                      |                               |          |                               |                      |                               |                                                                                                                                                                                                                                                                                                                                                                                   |                      |                               |                      |                               |          |                               |                      |                                                                                                                                                                                                                                                                                                                                                                                                                                                                                                                                                     |          |                               |                                                                                                                                                                                                                                                                                                                                                                                   |          |                               |                      |                               |                      |                               |          |                               |                      |                               |                      |                      |          |                      |                      |                                                                                                                                                                                                                                                                                                                                                                                                                                                                                                                                                     |  |      |     |          |                      |                      |          |                      |                      |          |                      |                      |          |                      |                      |          |                      |                      |
| Person 5 | <input type="text"/>                                                                                                                              | <input type="text"/>                                                                                                                                                                                                                                                                                                                                                                                                                                                                                                                                |                                                                                                                                                                 |                                                                                                                                                                 |          |                               |                      |                               |          |                               |                      |                               |                                                                                                                                                                                                                                                                                                                                                                                   |                      |                               |                      |                               |          |                               |                      |                                                                                                                                                                                                                                                                                                                                                                                                                                                                                                                                                     |          |                               |                                                                                                                                                                                                                                                                                                                                                                                   |          |                               |                      |                               |                      |                               |          |                               |                      |                               |                      |                      |          |                      |                      |                                                                                                                                                                                                                                                                                                                                                                                                                                                                                                                                                     |  |      |     |          |                      |                      |          |                      |                      |          |                      |                      |          |                      |                      |          |                      |                      |
| 06b      | If yes to Question 6: in the last 7 nights, how many nights did each person from Question 6 sleep under this net?                                 | <table border="1"> <tbody> <tr><td>Person 1</td><td><input type="text"/> night(s)</td></tr> <tr><td>Person 2</td><td><input type="text"/> night(s)</td></tr> <tr><td>Person 3</td><td><input type="text"/> night(s)</td></tr> <tr><td>Person 4</td><td><input type="text"/> night(s)</td></tr> <tr><td>Person 5</td><td><input type="text"/> night(s)</td></tr> </tbody> </table>                                                                                                                                                                   | Person 1                                                                                                                                                        | <input type="text"/> night(s)                                                                                                                                   | Person 2 | <input type="text"/> night(s) | Person 3             | <input type="text"/> night(s) | Person 4 | <input type="text"/> night(s) | Person 5             | <input type="text"/> night(s) | <table border="1"> <tbody> <tr><td>Person 1</td><td><input type="text"/> night(s)</td></tr> <tr><td>Person 2</td><td><input type="text"/> night(s)</td></tr> <tr><td>Person 3</td><td><input type="text"/> night(s)</td></tr> <tr><td>Person 4</td><td><input type="text"/> night(s)</td></tr> <tr><td>Person 5</td><td><input type="text"/> night(s)</td></tr> </tbody> </table> | Person 1             | <input type="text"/> night(s) | Person 2             | <input type="text"/> night(s) | Person 3 | <input type="text"/> night(s) | Person 4             | <input type="text"/> night(s)                                                                                                                                                                                                                                                                                                                                                                                                                                                                                                                       | Person 5 | <input type="text"/> night(s) | <table border="1"> <tbody> <tr><td>Person 1</td><td><input type="text"/> night(s)</td></tr> <tr><td>Person 2</td><td><input type="text"/> night(s)</td></tr> <tr><td>Person 3</td><td><input type="text"/> night(s)</td></tr> <tr><td>Person 4</td><td><input type="text"/> night(s)</td></tr> <tr><td>Person 5</td><td><input type="text"/> night(s)</td></tr> </tbody> </table> | Person 1 | <input type="text"/> night(s) | Person 2             | <input type="text"/> night(s) | Person 3             | <input type="text"/> night(s) | Person 4 | <input type="text"/> night(s) | Person 5             | <input type="text"/> night(s) |                      |                      |          |                      |                      |                                                                                                                                                                                                                                                                                                                                                                                                                                                                                                                                                     |  |      |     |          |                      |                      |          |                      |                      |          |                      |                      |          |                      |                      |          |                      |                      |
| Person 1 | <input type="text"/> night(s)                                                                                                                     |                                                                                                                                                                                                                                                                                                                                                                                                                                                                                                                                                     |                                                                                                                                                                 |                                                                                                                                                                 |          |                               |                      |                               |          |                               |                      |                               |                                                                                                                                                                                                                                                                                                                                                                                   |                      |                               |                      |                               |          |                               |                      |                                                                                                                                                                                                                                                                                                                                                                                                                                                                                                                                                     |          |                               |                                                                                                                                                                                                                                                                                                                                                                                   |          |                               |                      |                               |                      |                               |          |                               |                      |                               |                      |                      |          |                      |                      |                                                                                                                                                                                                                                                                                                                                                                                                                                                                                                                                                     |  |      |     |          |                      |                      |          |                      |                      |          |                      |                      |          |                      |                      |          |                      |                      |
| Person 2 | <input type="text"/> night(s)                                                                                                                     |                                                                                                                                                                                                                                                                                                                                                                                                                                                                                                                                                     |                                                                                                                                                                 |                                                                                                                                                                 |          |                               |                      |                               |          |                               |                      |                               |                                                                                                                                                                                                                                                                                                                                                                                   |                      |                               |                      |                               |          |                               |                      |                                                                                                                                                                                                                                                                                                                                                                                                                                                                                                                                                     |          |                               |                                                                                                                                                                                                                                                                                                                                                                                   |          |                               |                      |                               |                      |                               |          |                               |                      |                               |                      |                      |          |                      |                      |                                                                                                                                                                                                                                                                                                                                                                                                                                                                                                                                                     |  |      |     |          |                      |                      |          |                      |                      |          |                      |                      |          |                      |                      |          |                      |                      |
| Person 3 | <input type="text"/> night(s)                                                                                                                     |                                                                                                                                                                                                                                                                                                                                                                                                                                                                                                                                                     |                                                                                                                                                                 |                                                                                                                                                                 |          |                               |                      |                               |          |                               |                      |                               |                                                                                                                                                                                                                                                                                                                                                                                   |                      |                               |                      |                               |          |                               |                      |                                                                                                                                                                                                                                                                                                                                                                                                                                                                                                                                                     |          |                               |                                                                                                                                                                                                                                                                                                                                                                                   |          |                               |                      |                               |                      |                               |          |                               |                      |                               |                      |                      |          |                      |                      |                                                                                                                                                                                                                                                                                                                                                                                                                                                                                                                                                     |  |      |     |          |                      |                      |          |                      |                      |          |                      |                      |          |                      |                      |          |                      |                      |
| Person 4 | <input type="text"/> night(s)                                                                                                                     |                                                                                                                                                                                                                                                                                                                                                                                                                                                                                                                                                     |                                                                                                                                                                 |                                                                                                                                                                 |          |                               |                      |                               |          |                               |                      |                               |                                                                                                                                                                                                                                                                                                                                                                                   |                      |                               |                      |                               |          |                               |                      |                                                                                                                                                                                                                                                                                                                                                                                                                                                                                                                                                     |          |                               |                                                                                                                                                                                                                                                                                                                                                                                   |          |                               |                      |                               |                      |                               |          |                               |                      |                               |                      |                      |          |                      |                      |                                                                                                                                                                                                                                                                                                                                                                                                                                                                                                                                                     |  |      |     |          |                      |                      |          |                      |                      |          |                      |                      |          |                      |                      |          |                      |                      |
| Person 5 | <input type="text"/> night(s)                                                                                                                     |                                                                                                                                                                                                                                                                                                                                                                                                                                                                                                                                                     |                                                                                                                                                                 |                                                                                                                                                                 |          |                               |                      |                               |          |                               |                      |                               |                                                                                                                                                                                                                                                                                                                                                                                   |                      |                               |                      |                               |          |                               |                      |                                                                                                                                                                                                                                                                                                                                                                                                                                                                                                                                                     |          |                               |                                                                                                                                                                                                                                                                                                                                                                                   |          |                               |                      |                               |                      |                               |          |                               |                      |                               |                      |                      |          |                      |                      |                                                                                                                                                                                                                                                                                                                                                                                                                                                                                                                                                     |  |      |     |          |                      |                      |          |                      |                      |          |                      |                      |          |                      |                      |          |                      |                      |
| Person 1 | <input type="text"/> night(s)                                                                                                                     |                                                                                                                                                                                                                                                                                                                                                                                                                                                                                                                                                     |                                                                                                                                                                 |                                                                                                                                                                 |          |                               |                      |                               |          |                               |                      |                               |                                                                                                                                                                                                                                                                                                                                                                                   |                      |                               |                      |                               |          |                               |                      |                                                                                                                                                                                                                                                                                                                                                                                                                                                                                                                                                     |          |                               |                                                                                                                                                                                                                                                                                                                                                                                   |          |                               |                      |                               |                      |                               |          |                               |                      |                               |                      |                      |          |                      |                      |                                                                                                                                                                                                                                                                                                                                                                                                                                                                                                                                                     |  |      |     |          |                      |                      |          |                      |                      |          |                      |                      |          |                      |                      |          |                      |                      |
| Person 2 | <input type="text"/> night(s)                                                                                                                     |                                                                                                                                                                                                                                                                                                                                                                                                                                                                                                                                                     |                                                                                                                                                                 |                                                                                                                                                                 |          |                               |                      |                               |          |                               |                      |                               |                                                                                                                                                                                                                                                                                                                                                                                   |                      |                               |                      |                               |          |                               |                      |                                                                                                                                                                                                                                                                                                                                                                                                                                                                                                                                                     |          |                               |                                                                                                                                                                                                                                                                                                                                                                                   |          |                               |                      |                               |                      |                               |          |                               |                      |                               |                      |                      |          |                      |                      |                                                                                                                                                                                                                                                                                                                                                                                                                                                                                                                                                     |  |      |     |          |                      |                      |          |                      |                      |          |                      |                      |          |                      |                      |          |                      |                      |
| Person 3 | <input type="text"/> night(s)                                                                                                                     |                                                                                                                                                                                                                                                                                                                                                                                                                                                                                                                                                     |                                                                                                                                                                 |                                                                                                                                                                 |          |                               |                      |                               |          |                               |                      |                               |                                                                                                                                                                                                                                                                                                                                                                                   |                      |                               |                      |                               |          |                               |                      |                                                                                                                                                                                                                                                                                                                                                                                                                                                                                                                                                     |          |                               |                                                                                                                                                                                                                                                                                                                                                                                   |          |                               |                      |                               |                      |                               |          |                               |                      |                               |                      |                      |          |                      |                      |                                                                                                                                                                                                                                                                                                                                                                                                                                                                                                                                                     |  |      |     |          |                      |                      |          |                      |                      |          |                      |                      |          |                      |                      |          |                      |                      |
| Person 4 | <input type="text"/> night(s)                                                                                                                     |                                                                                                                                                                                                                                                                                                                                                                                                                                                                                                                                                     |                                                                                                                                                                 |                                                                                                                                                                 |          |                               |                      |                               |          |                               |                      |                               |                                                                                                                                                                                                                                                                                                                                                                                   |                      |                               |                      |                               |          |                               |                      |                                                                                                                                                                                                                                                                                                                                                                                                                                                                                                                                                     |          |                               |                                                                                                                                                                                                                                                                                                                                                                                   |          |                               |                      |                               |                      |                               |          |                               |                      |                               |                      |                      |          |                      |                      |                                                                                                                                                                                                                                                                                                                                                                                                                                                                                                                                                     |  |      |     |          |                      |                      |          |                      |                      |          |                      |                      |          |                      |                      |          |                      |                      |
| Person 5 | <input type="text"/> night(s)                                                                                                                     |                                                                                                                                                                                                                                                                                                                                                                                                                                                                                                                                                     |                                                                                                                                                                 |                                                                                                                                                                 |          |                               |                      |                               |          |                               |                      |                               |                                                                                                                                                                                                                                                                                                                                                                                   |                      |                               |                      |                               |          |                               |                      |                                                                                                                                                                                                                                                                                                                                                                                                                                                                                                                                                     |          |                               |                                                                                                                                                                                                                                                                                                                                                                                   |          |                               |                      |                               |                      |                               |          |                               |                      |                               |                      |                      |          |                      |                      |                                                                                                                                                                                                                                                                                                                                                                                                                                                                                                                                                     |  |      |     |          |                      |                      |          |                      |                      |          |                      |                      |          |                      |                      |          |                      |                      |
| Person 1 | <input type="text"/> night(s)                                                                                                                     |                                                                                                                                                                                                                                                                                                                                                                                                                                                                                                                                                     |                                                                                                                                                                 |                                                                                                                                                                 |          |                               |                      |                               |          |                               |                      |                               |                                                                                                                                                                                                                                                                                                                                                                                   |                      |                               |                      |                               |          |                               |                      |                                                                                                                                                                                                                                                                                                                                                                                                                                                                                                                                                     |          |                               |                                                                                                                                                                                                                                                                                                                                                                                   |          |                               |                      |                               |                      |                               |          |                               |                      |                               |                      |                      |          |                      |                      |                                                                                                                                                                                                                                                                                                                                                                                                                                                                                                                                                     |  |      |     |          |                      |                      |          |                      |                      |          |                      |                      |          |                      |                      |          |                      |                      |
| Person 2 | <input type="text"/> night(s)                                                                                                                     |                                                                                                                                                                                                                                                                                                                                                                                                                                                                                                                                                     |                                                                                                                                                                 |                                                                                                                                                                 |          |                               |                      |                               |          |                               |                      |                               |                                                                                                                                                                                                                                                                                                                                                                                   |                      |                               |                      |                               |          |                               |                      |                                                                                                                                                                                                                                                                                                                                                                                                                                                                                                                                                     |          |                               |                                                                                                                                                                                                                                                                                                                                                                                   |          |                               |                      |                               |                      |                               |          |                               |                      |                               |                      |                      |          |                      |                      |                                                                                                                                                                                                                                                                                                                                                                                                                                                                                                                                                     |  |      |     |          |                      |                      |          |                      |                      |          |                      |                      |          |                      |                      |          |                      |                      |
| Person 3 | <input type="text"/> night(s)                                                                                                                     |                                                                                                                                                                                                                                                                                                                                                                                                                                                                                                                                                     |                                                                                                                                                                 |                                                                                                                                                                 |          |                               |                      |                               |          |                               |                      |                               |                                                                                                                                                                                                                                                                                                                                                                                   |                      |                               |                      |                               |          |                               |                      |                                                                                                                                                                                                                                                                                                                                                                                                                                                                                                                                                     |          |                               |                                                                                                                                                                                                                                                                                                                                                                                   |          |                               |                      |                               |                      |                               |          |                               |                      |                               |                      |                      |          |                      |                      |                                                                                                                                                                                                                                                                                                                                                                                                                                                                                                                                                     |  |      |     |          |                      |                      |          |                      |                      |          |                      |                      |          |                      |                      |          |                      |                      |
| Person 4 | <input type="text"/> night(s)                                                                                                                     |                                                                                                                                                                                                                                                                                                                                                                                                                                                                                                                                                     |                                                                                                                                                                 |                                                                                                                                                                 |          |                               |                      |                               |          |                               |                      |                               |                                                                                                                                                                                                                                                                                                                                                                                   |                      |                               |                      |                               |          |                               |                      |                                                                                                                                                                                                                                                                                                                                                                                                                                                                                                                                                     |          |                               |                                                                                                                                                                                                                                                                                                                                                                                   |          |                               |                      |                               |                      |                               |          |                               |                      |                               |                      |                      |          |                      |                      |                                                                                                                                                                                                                                                                                                                                                                                                                                                                                                                                                     |  |      |     |          |                      |                      |          |                      |                      |          |                      |                      |          |                      |                      |          |                      |                      |
| Person 5 | <input type="text"/> night(s)                                                                                                                     |                                                                                                                                                                                                                                                                                                                                                                                                                                                                                                                                                     |                                                                                                                                                                 |                                                                                                                                                                 |          |                               |                      |                               |          |                               |                      |                               |                                                                                                                                                                                                                                                                                                                                                                                   |                      |                               |                      |                               |          |                               |                      |                                                                                                                                                                                                                                                                                                                                                                                                                                                                                                                                                     |          |                               |                                                                                                                                                                                                                                                                                                                                                                                   |          |                               |                      |                               |                      |                               |          |                               |                      |                               |                      |                      |          |                      |                      |                                                                                                                                                                                                                                                                                                                                                                                                                                                                                                                                                     |  |      |     |          |                      |                      |          |                      |                      |          |                      |                      |          |                      |                      |          |                      |                      |

Interviewer Code: \_\_\_\_\_

# Baseline Household Questionnaire. (Continued)

Endemicity-Village-Household ID:

| #        | Bed Net Questions                                                                                                                                 | Net #4                                                                                                                                                                                                                                                                                                                                                                                                                                                                                                                                              | Net #5                                                                                                                                                          | Net #6                                                                                                                                                          |          |                               |                      |                               |          |                               |                      |                               |                                                                                                                                                                                                                                                                                                                                                                                   |                      |                               |                      |                               |          |                               |                      |                                                                                                                                                                                                                                                                                                                                                                                                                                                                                                                                                     |          |                               |                                                                                                                                                                                                                                                                                                                                                                                   |          |                               |                      |                               |                      |                               |          |                               |                      |                               |                      |                      |          |                      |                      |                                                                                                                                                                                                                                                                                                                                                                                                                                                                                                                                                     |  |      |     |          |                      |                      |          |                      |                      |          |                      |                      |          |                      |                      |          |                      |                      |
|----------|---------------------------------------------------------------------------------------------------------------------------------------------------|-----------------------------------------------------------------------------------------------------------------------------------------------------------------------------------------------------------------------------------------------------------------------------------------------------------------------------------------------------------------------------------------------------------------------------------------------------------------------------------------------------------------------------------------------------|-----------------------------------------------------------------------------------------------------------------------------------------------------------------|-----------------------------------------------------------------------------------------------------------------------------------------------------------------|----------|-------------------------------|----------------------|-------------------------------|----------|-------------------------------|----------------------|-------------------------------|-----------------------------------------------------------------------------------------------------------------------------------------------------------------------------------------------------------------------------------------------------------------------------------------------------------------------------------------------------------------------------------|----------------------|-------------------------------|----------------------|-------------------------------|----------|-------------------------------|----------------------|-----------------------------------------------------------------------------------------------------------------------------------------------------------------------------------------------------------------------------------------------------------------------------------------------------------------------------------------------------------------------------------------------------------------------------------------------------------------------------------------------------------------------------------------------------|----------|-------------------------------|-----------------------------------------------------------------------------------------------------------------------------------------------------------------------------------------------------------------------------------------------------------------------------------------------------------------------------------------------------------------------------------|----------|-------------------------------|----------------------|-------------------------------|----------------------|-------------------------------|----------|-------------------------------|----------------------|-------------------------------|----------------------|----------------------|----------|----------------------|----------------------|-----------------------------------------------------------------------------------------------------------------------------------------------------------------------------------------------------------------------------------------------------------------------------------------------------------------------------------------------------------------------------------------------------------------------------------------------------------------------------------------------------------------------------------------------------|--|------|-----|----------|----------------------|----------------------|----------|----------------------|----------------------|----------|----------------------|----------------------|----------|----------------------|----------------------|----------|----------------------|----------------------|
| 01       | INTERVIEWER RESPONDS:<br>Did you observe this net?                                                                                                | Observed 01<br>Not observed 00                                                                                                                                                                                                                                                                                                                                                                                                                                                                                                                      | Observed 01<br>Not observed 00                                                                                                                                  | Observed 01<br>Not observed 00                                                                                                                                  |          |                               |                      |                               |          |                               |                      |                               |                                                                                                                                                                                                                                                                                                                                                                                   |                      |                               |                      |                               |          |                               |                      |                                                                                                                                                                                                                                                                                                                                                                                                                                                                                                                                                     |          |                               |                                                                                                                                                                                                                                                                                                                                                                                   |          |                               |                      |                               |                      |                               |          |                               |                      |                               |                      |                      |          |                      |                      |                                                                                                                                                                                                                                                                                                                                                                                                                                                                                                                                                     |  |      |     |          |                      |                      |          |                      |                      |          |                      |                      |          |                      |                      |          |                      |                      |
| 02       | INTERVIEWER RESPONDS:<br>Are there holes in this net?                                                                                             | Yes 01<br>No 00<br>N/A 96                                                                                                                                                                                                                                                                                                                                                                                                                                                                                                                           | Yes 01<br>No 00<br>N/A 96                                                                                                                                       | Yes 01<br>No 00<br>N/A 96                                                                                                                                       |          |                               |                      |                               |          |                               |                      |                               |                                                                                                                                                                                                                                                                                                                                                                                   |                      |                               |                      |                               |          |                               |                      |                                                                                                                                                                                                                                                                                                                                                                                                                                                                                                                                                     |          |                               |                                                                                                                                                                                                                                                                                                                                                                                   |          |                               |                      |                               |                      |                               |          |                               |                      |                               |                      |                      |          |                      |                      |                                                                                                                                                                                                                                                                                                                                                                                                                                                                                                                                                     |  |      |     |          |                      |                      |          |                      |                      |          |                      |                      |          |                      |                      |          |                      |                      |
| 03       | INTERVIEWER RESPONDS:<br>Is this net correctly installed?                                                                                         | Yes 01<br>No 00<br>N/A 96                                                                                                                                                                                                                                                                                                                                                                                                                                                                                                                           | Yes 01<br>No 00<br>N/A 96                                                                                                                                       | Yes 01<br>No 00<br>N/A 96                                                                                                                                       |          |                               |                      |                               |          |                               |                      |                               |                                                                                                                                                                                                                                                                                                                                                                                   |                      |                               |                      |                               |          |                               |                      |                                                                                                                                                                                                                                                                                                                                                                                                                                                                                                                                                     |          |                               |                                                                                                                                                                                                                                                                                                                                                                                   |          |                               |                      |                               |                      |                               |          |                               |                      |                               |                      |                      |          |                      |                      |                                                                                                                                                                                                                                                                                                                                                                                                                                                                                                                                                     |  |      |     |          |                      |                      |          |                      |                      |          |                      |                      |          |                      |                      |          |                      |                      |
| 04       | How many months have you had this net?<br>If <1 month, enter 00.<br>If >36 months, enter 95.<br>If don't know, enter 98.<br>If refused, enter 99. | <input type="text"/> <input type="text"/> months                                                                                                                                                                                                                                                                                                                                                                                                                                                                                                    | <input type="text"/> <input type="text"/> months                                                                                                                | <input type="text"/> <input type="text"/> months                                                                                                                |          |                               |                      |                               |          |                               |                      |                               |                                                                                                                                                                                                                                                                                                                                                                                   |                      |                               |                      |                               |          |                               |                      |                                                                                                                                                                                                                                                                                                                                                                                                                                                                                                                                                     |          |                               |                                                                                                                                                                                                                                                                                                                                                                                   |          |                               |                      |                               |                      |                               |          |                               |                      |                               |                      |                      |          |                      |                      |                                                                                                                                                                                                                                                                                                                                                                                                                                                                                                                                                     |  |      |     |          |                      |                      |          |                      |                      |          |                      |                      |          |                      |                      |          |                      |                      |
| 05       | Where did you get this net?                                                                                                                       | Purchased at market 01<br>Mass distribution 02<br>Antenatal clinic 03<br>Hospital 04<br>N/A 96<br>Other 97<br>Please list: _____<br>Don't know 98<br>Refused 99                                                                                                                                                                                                                                                                                                                                                                                     | Purchased at market 01<br>Mass distribution 02<br>Antenatal clinic 03<br>Hospital 04<br>N/A 96<br>Other 97<br>Please list: _____<br>Don't know 98<br>Refused 99 | Purchased at market 01<br>Mass distribution 02<br>Antenatal clinic 03<br>Hospital 04<br>N/A 96<br>Other 97<br>Please list: _____<br>Don't know 98<br>Refused 99 |          |                               |                      |                               |          |                               |                      |                               |                                                                                                                                                                                                                                                                                                                                                                                   |                      |                               |                      |                               |          |                               |                      |                                                                                                                                                                                                                                                                                                                                                                                                                                                                                                                                                     |          |                               |                                                                                                                                                                                                                                                                                                                                                                                   |          |                               |                      |                               |                      |                               |          |                               |                      |                               |                      |                      |          |                      |                      |                                                                                                                                                                                                                                                                                                                                                                                                                                                                                                                                                     |  |      |     |          |                      |                      |          |                      |                      |          |                      |                      |          |                      |                      |          |                      |                      |
| 06       | Did someone sleep under this net last night?<br><br>IF NO: return to Question 1 for the next net or skip to page 7 if this is the last net.       | Yes 01<br>No 00<br>N/A 96<br>Don't know 98<br>Refused 99                                                                                                                                                                                                                                                                                                                                                                                                                                                                                            | Yes 01<br>No 00<br>N/A 96<br>Don't know 98<br>Refused 99                                                                                                        | Yes 01<br>No 00<br>N/A 96<br>Don't know 98<br>Refused 99                                                                                                        |          |                               |                      |                               |          |                               |                      |                               |                                                                                                                                                                                                                                                                                                                                                                                   |                      |                               |                      |                               |          |                               |                      |                                                                                                                                                                                                                                                                                                                                                                                                                                                                                                                                                     |          |                               |                                                                                                                                                                                                                                                                                                                                                                                   |          |                               |                      |                               |                      |                               |          |                               |                      |                               |                      |                      |          |                      |                      |                                                                                                                                                                                                                                                                                                                                                                                                                                                                                                                                                     |  |      |     |          |                      |                      |          |                      |                      |          |                      |                      |          |                      |                      |          |                      |                      |
| 06a      | If yes to Question 6: who slept under this net?<br>Enter the name and age of each person.                                                         | <table border="1"> <thead> <tr> <th></th><th>Name</th><th>Age</th></tr> </thead> <tbody> <tr><td>Person 1</td><td><input type="text"/></td><td><input type="text"/></td></tr> <tr><td>Person 2</td><td><input type="text"/></td><td><input type="text"/></td></tr> <tr><td>Person 3</td><td><input type="text"/></td><td><input type="text"/></td></tr> <tr><td>Person 4</td><td><input type="text"/></td><td><input type="text"/></td></tr> <tr><td>Person 5</td><td><input type="text"/></td><td><input type="text"/></td></tr> </tbody> </table> |                                                                                                                                                                 | Name                                                                                                                                                            | Age      | Person 1                      | <input type="text"/> | <input type="text"/>          | Person 2 | <input type="text"/>          | <input type="text"/> | Person 3                      | <input type="text"/>                                                                                                                                                                                                                                                                                                                                                              | <input type="text"/> | Person 4                      | <input type="text"/> | <input type="text"/>          | Person 5 | <input type="text"/>          | <input type="text"/> | <table border="1"> <thead> <tr> <th></th><th>Name</th><th>Age</th></tr> </thead> <tbody> <tr><td>Person 1</td><td><input type="text"/></td><td><input type="text"/></td></tr> <tr><td>Person 2</td><td><input type="text"/></td><td><input type="text"/></td></tr> <tr><td>Person 3</td><td><input type="text"/></td><td><input type="text"/></td></tr> <tr><td>Person 4</td><td><input type="text"/></td><td><input type="text"/></td></tr> <tr><td>Person 5</td><td><input type="text"/></td><td><input type="text"/></td></tr> </tbody> </table> |          | Name                          | Age                                                                                                                                                                                                                                                                                                                                                                               | Person 1 | <input type="text"/>          | <input type="text"/> | Person 2                      | <input type="text"/> | <input type="text"/>          | Person 3 | <input type="text"/>          | <input type="text"/> | Person 4                      | <input type="text"/> | <input type="text"/> | Person 5 | <input type="text"/> | <input type="text"/> | <table border="1"> <thead> <tr> <th></th><th>Name</th><th>Age</th></tr> </thead> <tbody> <tr><td>Person 1</td><td><input type="text"/></td><td><input type="text"/></td></tr> <tr><td>Person 2</td><td><input type="text"/></td><td><input type="text"/></td></tr> <tr><td>Person 3</td><td><input type="text"/></td><td><input type="text"/></td></tr> <tr><td>Person 4</td><td><input type="text"/></td><td><input type="text"/></td></tr> <tr><td>Person 5</td><td><input type="text"/></td><td><input type="text"/></td></tr> </tbody> </table> |  | Name | Age | Person 1 | <input type="text"/> | <input type="text"/> | Person 2 | <input type="text"/> | <input type="text"/> | Person 3 | <input type="text"/> | <input type="text"/> | Person 4 | <input type="text"/> | <input type="text"/> | Person 5 | <input type="text"/> | <input type="text"/> |
|          | Name                                                                                                                                              | Age                                                                                                                                                                                                                                                                                                                                                                                                                                                                                                                                                 |                                                                                                                                                                 |                                                                                                                                                                 |          |                               |                      |                               |          |                               |                      |                               |                                                                                                                                                                                                                                                                                                                                                                                   |                      |                               |                      |                               |          |                               |                      |                                                                                                                                                                                                                                                                                                                                                                                                                                                                                                                                                     |          |                               |                                                                                                                                                                                                                                                                                                                                                                                   |          |                               |                      |                               |                      |                               |          |                               |                      |                               |                      |                      |          |                      |                      |                                                                                                                                                                                                                                                                                                                                                                                                                                                                                                                                                     |  |      |     |          |                      |                      |          |                      |                      |          |                      |                      |          |                      |                      |          |                      |                      |
| Person 1 | <input type="text"/>                                                                                                                              | <input type="text"/>                                                                                                                                                                                                                                                                                                                                                                                                                                                                                                                                |                                                                                                                                                                 |                                                                                                                                                                 |          |                               |                      |                               |          |                               |                      |                               |                                                                                                                                                                                                                                                                                                                                                                                   |                      |                               |                      |                               |          |                               |                      |                                                                                                                                                                                                                                                                                                                                                                                                                                                                                                                                                     |          |                               |                                                                                                                                                                                                                                                                                                                                                                                   |          |                               |                      |                               |                      |                               |          |                               |                      |                               |                      |                      |          |                      |                      |                                                                                                                                                                                                                                                                                                                                                                                                                                                                                                                                                     |  |      |     |          |                      |                      |          |                      |                      |          |                      |                      |          |                      |                      |          |                      |                      |
| Person 2 | <input type="text"/>                                                                                                                              | <input type="text"/>                                                                                                                                                                                                                                                                                                                                                                                                                                                                                                                                |                                                                                                                                                                 |                                                                                                                                                                 |          |                               |                      |                               |          |                               |                      |                               |                                                                                                                                                                                                                                                                                                                                                                                   |                      |                               |                      |                               |          |                               |                      |                                                                                                                                                                                                                                                                                                                                                                                                                                                                                                                                                     |          |                               |                                                                                                                                                                                                                                                                                                                                                                                   |          |                               |                      |                               |                      |                               |          |                               |                      |                               |                      |                      |          |                      |                      |                                                                                                                                                                                                                                                                                                                                                                                                                                                                                                                                                     |  |      |     |          |                      |                      |          |                      |                      |          |                      |                      |          |                      |                      |          |                      |                      |
| Person 3 | <input type="text"/>                                                                                                                              | <input type="text"/>                                                                                                                                                                                                                                                                                                                                                                                                                                                                                                                                |                                                                                                                                                                 |                                                                                                                                                                 |          |                               |                      |                               |          |                               |                      |                               |                                                                                                                                                                                                                                                                                                                                                                                   |                      |                               |                      |                               |          |                               |                      |                                                                                                                                                                                                                                                                                                                                                                                                                                                                                                                                                     |          |                               |                                                                                                                                                                                                                                                                                                                                                                                   |          |                               |                      |                               |                      |                               |          |                               |                      |                               |                      |                      |          |                      |                      |                                                                                                                                                                                                                                                                                                                                                                                                                                                                                                                                                     |  |      |     |          |                      |                      |          |                      |                      |          |                      |                      |          |                      |                      |          |                      |                      |
| Person 4 | <input type="text"/>                                                                                                                              | <input type="text"/>                                                                                                                                                                                                                                                                                                                                                                                                                                                                                                                                |                                                                                                                                                                 |                                                                                                                                                                 |          |                               |                      |                               |          |                               |                      |                               |                                                                                                                                                                                                                                                                                                                                                                                   |                      |                               |                      |                               |          |                               |                      |                                                                                                                                                                                                                                                                                                                                                                                                                                                                                                                                                     |          |                               |                                                                                                                                                                                                                                                                                                                                                                                   |          |                               |                      |                               |                      |                               |          |                               |                      |                               |                      |                      |          |                      |                      |                                                                                                                                                                                                                                                                                                                                                                                                                                                                                                                                                     |  |      |     |          |                      |                      |          |                      |                      |          |                      |                      |          |                      |                      |          |                      |                      |
| Person 5 | <input type="text"/>                                                                                                                              | <input type="text"/>                                                                                                                                                                                                                                                                                                                                                                                                                                                                                                                                |                                                                                                                                                                 |                                                                                                                                                                 |          |                               |                      |                               |          |                               |                      |                               |                                                                                                                                                                                                                                                                                                                                                                                   |                      |                               |                      |                               |          |                               |                      |                                                                                                                                                                                                                                                                                                                                                                                                                                                                                                                                                     |          |                               |                                                                                                                                                                                                                                                                                                                                                                                   |          |                               |                      |                               |                      |                               |          |                               |                      |                               |                      |                      |          |                      |                      |                                                                                                                                                                                                                                                                                                                                                                                                                                                                                                                                                     |  |      |     |          |                      |                      |          |                      |                      |          |                      |                      |          |                      |                      |          |                      |                      |
|          | Name                                                                                                                                              | Age                                                                                                                                                                                                                                                                                                                                                                                                                                                                                                                                                 |                                                                                                                                                                 |                                                                                                                                                                 |          |                               |                      |                               |          |                               |                      |                               |                                                                                                                                                                                                                                                                                                                                                                                   |                      |                               |                      |                               |          |                               |                      |                                                                                                                                                                                                                                                                                                                                                                                                                                                                                                                                                     |          |                               |                                                                                                                                                                                                                                                                                                                                                                                   |          |                               |                      |                               |                      |                               |          |                               |                      |                               |                      |                      |          |                      |                      |                                                                                                                                                                                                                                                                                                                                                                                                                                                                                                                                                     |  |      |     |          |                      |                      |          |                      |                      |          |                      |                      |          |                      |                      |          |                      |                      |
| Person 1 | <input type="text"/>                                                                                                                              | <input type="text"/>                                                                                                                                                                                                                                                                                                                                                                                                                                                                                                                                |                                                                                                                                                                 |                                                                                                                                                                 |          |                               |                      |                               |          |                               |                      |                               |                                                                                                                                                                                                                                                                                                                                                                                   |                      |                               |                      |                               |          |                               |                      |                                                                                                                                                                                                                                                                                                                                                                                                                                                                                                                                                     |          |                               |                                                                                                                                                                                                                                                                                                                                                                                   |          |                               |                      |                               |                      |                               |          |                               |                      |                               |                      |                      |          |                      |                      |                                                                                                                                                                                                                                                                                                                                                                                                                                                                                                                                                     |  |      |     |          |                      |                      |          |                      |                      |          |                      |                      |          |                      |                      |          |                      |                      |
| Person 2 | <input type="text"/>                                                                                                                              | <input type="text"/>                                                                                                                                                                                                                                                                                                                                                                                                                                                                                                                                |                                                                                                                                                                 |                                                                                                                                                                 |          |                               |                      |                               |          |                               |                      |                               |                                                                                                                                                                                                                                                                                                                                                                                   |                      |                               |                      |                               |          |                               |                      |                                                                                                                                                                                                                                                                                                                                                                                                                                                                                                                                                     |          |                               |                                                                                                                                                                                                                                                                                                                                                                                   |          |                               |                      |                               |                      |                               |          |                               |                      |                               |                      |                      |          |                      |                      |                                                                                                                                                                                                                                                                                                                                                                                                                                                                                                                                                     |  |      |     |          |                      |                      |          |                      |                      |          |                      |                      |          |                      |                      |          |                      |                      |
| Person 3 | <input type="text"/>                                                                                                                              | <input type="text"/>                                                                                                                                                                                                                                                                                                                                                                                                                                                                                                                                |                                                                                                                                                                 |                                                                                                                                                                 |          |                               |                      |                               |          |                               |                      |                               |                                                                                                                                                                                                                                                                                                                                                                                   |                      |                               |                      |                               |          |                               |                      |                                                                                                                                                                                                                                                                                                                                                                                                                                                                                                                                                     |          |                               |                                                                                                                                                                                                                                                                                                                                                                                   |          |                               |                      |                               |                      |                               |          |                               |                      |                               |                      |                      |          |                      |                      |                                                                                                                                                                                                                                                                                                                                                                                                                                                                                                                                                     |  |      |     |          |                      |                      |          |                      |                      |          |                      |                      |          |                      |                      |          |                      |                      |
| Person 4 | <input type="text"/>                                                                                                                              | <input type="text"/>                                                                                                                                                                                                                                                                                                                                                                                                                                                                                                                                |                                                                                                                                                                 |                                                                                                                                                                 |          |                               |                      |                               |          |                               |                      |                               |                                                                                                                                                                                                                                                                                                                                                                                   |                      |                               |                      |                               |          |                               |                      |                                                                                                                                                                                                                                                                                                                                                                                                                                                                                                                                                     |          |                               |                                                                                                                                                                                                                                                                                                                                                                                   |          |                               |                      |                               |                      |                               |          |                               |                      |                               |                      |                      |          |                      |                      |                                                                                                                                                                                                                                                                                                                                                                                                                                                                                                                                                     |  |      |     |          |                      |                      |          |                      |                      |          |                      |                      |          |                      |                      |          |                      |                      |
| Person 5 | <input type="text"/>                                                                                                                              | <input type="text"/>                                                                                                                                                                                                                                                                                                                                                                                                                                                                                                                                |                                                                                                                                                                 |                                                                                                                                                                 |          |                               |                      |                               |          |                               |                      |                               |                                                                                                                                                                                                                                                                                                                                                                                   |                      |                               |                      |                               |          |                               |                      |                                                                                                                                                                                                                                                                                                                                                                                                                                                                                                                                                     |          |                               |                                                                                                                                                                                                                                                                                                                                                                                   |          |                               |                      |                               |                      |                               |          |                               |                      |                               |                      |                      |          |                      |                      |                                                                                                                                                                                                                                                                                                                                                                                                                                                                                                                                                     |  |      |     |          |                      |                      |          |                      |                      |          |                      |                      |          |                      |                      |          |                      |                      |
|          | Name                                                                                                                                              | Age                                                                                                                                                                                                                                                                                                                                                                                                                                                                                                                                                 |                                                                                                                                                                 |                                                                                                                                                                 |          |                               |                      |                               |          |                               |                      |                               |                                                                                                                                                                                                                                                                                                                                                                                   |                      |                               |                      |                               |          |                               |                      |                                                                                                                                                                                                                                                                                                                                                                                                                                                                                                                                                     |          |                               |                                                                                                                                                                                                                                                                                                                                                                                   |          |                               |                      |                               |                      |                               |          |                               |                      |                               |                      |                      |          |                      |                      |                                                                                                                                                                                                                                                                                                                                                                                                                                                                                                                                                     |  |      |     |          |                      |                      |          |                      |                      |          |                      |                      |          |                      |                      |          |                      |                      |
| Person 1 | <input type="text"/>                                                                                                                              | <input type="text"/>                                                                                                                                                                                                                                                                                                                                                                                                                                                                                                                                |                                                                                                                                                                 |                                                                                                                                                                 |          |                               |                      |                               |          |                               |                      |                               |                                                                                                                                                                                                                                                                                                                                                                                   |                      |                               |                      |                               |          |                               |                      |                                                                                                                                                                                                                                                                                                                                                                                                                                                                                                                                                     |          |                               |                                                                                                                                                                                                                                                                                                                                                                                   |          |                               |                      |                               |                      |                               |          |                               |                      |                               |                      |                      |          |                      |                      |                                                                                                                                                                                                                                                                                                                                                                                                                                                                                                                                                     |  |      |     |          |                      |                      |          |                      |                      |          |                      |                      |          |                      |                      |          |                      |                      |
| Person 2 | <input type="text"/>                                                                                                                              | <input type="text"/>                                                                                                                                                                                                                                                                                                                                                                                                                                                                                                                                |                                                                                                                                                                 |                                                                                                                                                                 |          |                               |                      |                               |          |                               |                      |                               |                                                                                                                                                                                                                                                                                                                                                                                   |                      |                               |                      |                               |          |                               |                      |                                                                                                                                                                                                                                                                                                                                                                                                                                                                                                                                                     |          |                               |                                                                                                                                                                                                                                                                                                                                                                                   |          |                               |                      |                               |                      |                               |          |                               |                      |                               |                      |                      |          |                      |                      |                                                                                                                                                                                                                                                                                                                                                                                                                                                                                                                                                     |  |      |     |          |                      |                      |          |                      |                      |          |                      |                      |          |                      |                      |          |                      |                      |
| Person 3 | <input type="text"/>                                                                                                                              | <input type="text"/>                                                                                                                                                                                                                                                                                                                                                                                                                                                                                                                                |                                                                                                                                                                 |                                                                                                                                                                 |          |                               |                      |                               |          |                               |                      |                               |                                                                                                                                                                                                                                                                                                                                                                                   |                      |                               |                      |                               |          |                               |                      |                                                                                                                                                                                                                                                                                                                                                                                                                                                                                                                                                     |          |                               |                                                                                                                                                                                                                                                                                                                                                                                   |          |                               |                      |                               |                      |                               |          |                               |                      |                               |                      |                      |          |                      |                      |                                                                                                                                                                                                                                                                                                                                                                                                                                                                                                                                                     |  |      |     |          |                      |                      |          |                      |                      |          |                      |                      |          |                      |                      |          |                      |                      |
| Person 4 | <input type="text"/>                                                                                                                              | <input type="text"/>                                                                                                                                                                                                                                                                                                                                                                                                                                                                                                                                |                                                                                                                                                                 |                                                                                                                                                                 |          |                               |                      |                               |          |                               |                      |                               |                                                                                                                                                                                                                                                                                                                                                                                   |                      |                               |                      |                               |          |                               |                      |                                                                                                                                                                                                                                                                                                                                                                                                                                                                                                                                                     |          |                               |                                                                                                                                                                                                                                                                                                                                                                                   |          |                               |                      |                               |                      |                               |          |                               |                      |                               |                      |                      |          |                      |                      |                                                                                                                                                                                                                                                                                                                                                                                                                                                                                                                                                     |  |      |     |          |                      |                      |          |                      |                      |          |                      |                      |          |                      |                      |          |                      |                      |
| Person 5 | <input type="text"/>                                                                                                                              | <input type="text"/>                                                                                                                                                                                                                                                                                                                                                                                                                                                                                                                                |                                                                                                                                                                 |                                                                                                                                                                 |          |                               |                      |                               |          |                               |                      |                               |                                                                                                                                                                                                                                                                                                                                                                                   |                      |                               |                      |                               |          |                               |                      |                                                                                                                                                                                                                                                                                                                                                                                                                                                                                                                                                     |          |                               |                                                                                                                                                                                                                                                                                                                                                                                   |          |                               |                      |                               |                      |                               |          |                               |                      |                               |                      |                      |          |                      |                      |                                                                                                                                                                                                                                                                                                                                                                                                                                                                                                                                                     |  |      |     |          |                      |                      |          |                      |                      |          |                      |                      |          |                      |                      |          |                      |                      |
| 06b      | If yes to Question 6: in the last 7 nights, how many nights did each person from Question 6 sleep under this net?                                 | <table border="1"> <tbody> <tr><td>Person 1</td><td><input type="text"/> night(s)</td></tr> <tr><td>Person 2</td><td><input type="text"/> night(s)</td></tr> <tr><td>Person 3</td><td><input type="text"/> night(s)</td></tr> <tr><td>Person 4</td><td><input type="text"/> night(s)</td></tr> <tr><td>Person 5</td><td><input type="text"/> night(s)</td></tr> </tbody> </table>                                                                                                                                                                   | Person 1                                                                                                                                                        | <input type="text"/> night(s)                                                                                                                                   | Person 2 | <input type="text"/> night(s) | Person 3             | <input type="text"/> night(s) | Person 4 | <input type="text"/> night(s) | Person 5             | <input type="text"/> night(s) | <table border="1"> <tbody> <tr><td>Person 1</td><td><input type="text"/> night(s)</td></tr> <tr><td>Person 2</td><td><input type="text"/> night(s)</td></tr> <tr><td>Person 3</td><td><input type="text"/> night(s)</td></tr> <tr><td>Person 4</td><td><input type="text"/> night(s)</td></tr> <tr><td>Person 5</td><td><input type="text"/> night(s)</td></tr> </tbody> </table> | Person 1             | <input type="text"/> night(s) | Person 2             | <input type="text"/> night(s) | Person 3 | <input type="text"/> night(s) | Person 4             | <input type="text"/> night(s)                                                                                                                                                                                                                                                                                                                                                                                                                                                                                                                       | Person 5 | <input type="text"/> night(s) | <table border="1"> <tbody> <tr><td>Person 1</td><td><input type="text"/> night(s)</td></tr> <tr><td>Person 2</td><td><input type="text"/> night(s)</td></tr> <tr><td>Person 3</td><td><input type="text"/> night(s)</td></tr> <tr><td>Person 4</td><td><input type="text"/> night(s)</td></tr> <tr><td>Person 5</td><td><input type="text"/> night(s)</td></tr> </tbody> </table> | Person 1 | <input type="text"/> night(s) | Person 2             | <input type="text"/> night(s) | Person 3             | <input type="text"/> night(s) | Person 4 | <input type="text"/> night(s) | Person 5             | <input type="text"/> night(s) |                      |                      |          |                      |                      |                                                                                                                                                                                                                                                                                                                                                                                                                                                                                                                                                     |  |      |     |          |                      |                      |          |                      |                      |          |                      |                      |          |                      |                      |          |                      |                      |
| Person 1 | <input type="text"/> night(s)                                                                                                                     |                                                                                                                                                                                                                                                                                                                                                                                                                                                                                                                                                     |                                                                                                                                                                 |                                                                                                                                                                 |          |                               |                      |                               |          |                               |                      |                               |                                                                                                                                                                                                                                                                                                                                                                                   |                      |                               |                      |                               |          |                               |                      |                                                                                                                                                                                                                                                                                                                                                                                                                                                                                                                                                     |          |                               |                                                                                                                                                                                                                                                                                                                                                                                   |          |                               |                      |                               |                      |                               |          |                               |                      |                               |                      |                      |          |                      |                      |                                                                                                                                                                                                                                                                                                                                                                                                                                                                                                                                                     |  |      |     |          |                      |                      |          |                      |                      |          |                      |                      |          |                      |                      |          |                      |                      |
| Person 2 | <input type="text"/> night(s)                                                                                                                     |                                                                                                                                                                                                                                                                                                                                                                                                                                                                                                                                                     |                                                                                                                                                                 |                                                                                                                                                                 |          |                               |                      |                               |          |                               |                      |                               |                                                                                                                                                                                                                                                                                                                                                                                   |                      |                               |                      |                               |          |                               |                      |                                                                                                                                                                                                                                                                                                                                                                                                                                                                                                                                                     |          |                               |                                                                                                                                                                                                                                                                                                                                                                                   |          |                               |                      |                               |                      |                               |          |                               |                      |                               |                      |                      |          |                      |                      |                                                                                                                                                                                                                                                                                                                                                                                                                                                                                                                                                     |  |      |     |          |                      |                      |          |                      |                      |          |                      |                      |          |                      |                      |          |                      |                      |
| Person 3 | <input type="text"/> night(s)                                                                                                                     |                                                                                                                                                                                                                                                                                                                                                                                                                                                                                                                                                     |                                                                                                                                                                 |                                                                                                                                                                 |          |                               |                      |                               |          |                               |                      |                               |                                                                                                                                                                                                                                                                                                                                                                                   |                      |                               |                      |                               |          |                               |                      |                                                                                                                                                                                                                                                                                                                                                                                                                                                                                                                                                     |          |                               |                                                                                                                                                                                                                                                                                                                                                                                   |          |                               |                      |                               |                      |                               |          |                               |                      |                               |                      |                      |          |                      |                      |                                                                                                                                                                                                                                                                                                                                                                                                                                                                                                                                                     |  |      |     |          |                      |                      |          |                      |                      |          |                      |                      |          |                      |                      |          |                      |                      |
| Person 4 | <input type="text"/> night(s)                                                                                                                     |                                                                                                                                                                                                                                                                                                                                                                                                                                                                                                                                                     |                                                                                                                                                                 |                                                                                                                                                                 |          |                               |                      |                               |          |                               |                      |                               |                                                                                                                                                                                                                                                                                                                                                                                   |                      |                               |                      |                               |          |                               |                      |                                                                                                                                                                                                                                                                                                                                                                                                                                                                                                                                                     |          |                               |                                                                                                                                                                                                                                                                                                                                                                                   |          |                               |                      |                               |                      |                               |          |                               |                      |                               |                      |                      |          |                      |                      |                                                                                                                                                                                                                                                                                                                                                                                                                                                                                                                                                     |  |      |     |          |                      |                      |          |                      |                      |          |                      |                      |          |                      |                      |          |                      |                      |
| Person 5 | <input type="text"/> night(s)                                                                                                                     |                                                                                                                                                                                                                                                                                                                                                                                                                                                                                                                                                     |                                                                                                                                                                 |                                                                                                                                                                 |          |                               |                      |                               |          |                               |                      |                               |                                                                                                                                                                                                                                                                                                                                                                                   |                      |                               |                      |                               |          |                               |                      |                                                                                                                                                                                                                                                                                                                                                                                                                                                                                                                                                     |          |                               |                                                                                                                                                                                                                                                                                                                                                                                   |          |                               |                      |                               |                      |                               |          |                               |                      |                               |                      |                      |          |                      |                      |                                                                                                                                                                                                                                                                                                                                                                                                                                                                                                                                                     |  |      |     |          |                      |                      |          |                      |                      |          |                      |                      |          |                      |                      |          |                      |                      |
| Person 1 | <input type="text"/> night(s)                                                                                                                     |                                                                                                                                                                                                                                                                                                                                                                                                                                                                                                                                                     |                                                                                                                                                                 |                                                                                                                                                                 |          |                               |                      |                               |          |                               |                      |                               |                                                                                                                                                                                                                                                                                                                                                                                   |                      |                               |                      |                               |          |                               |                      |                                                                                                                                                                                                                                                                                                                                                                                                                                                                                                                                                     |          |                               |                                                                                                                                                                                                                                                                                                                                                                                   |          |                               |                      |                               |                      |                               |          |                               |                      |                               |                      |                      |          |                      |                      |                                                                                                                                                                                                                                                                                                                                                                                                                                                                                                                                                     |  |      |     |          |                      |                      |          |                      |                      |          |                      |                      |          |                      |                      |          |                      |                      |
| Person 2 | <input type="text"/> night(s)                                                                                                                     |                                                                                                                                                                                                                                                                                                                                                                                                                                                                                                                                                     |                                                                                                                                                                 |                                                                                                                                                                 |          |                               |                      |                               |          |                               |                      |                               |                                                                                                                                                                                                                                                                                                                                                                                   |                      |                               |                      |                               |          |                               |                      |                                                                                                                                                                                                                                                                                                                                                                                                                                                                                                                                                     |          |                               |                                                                                                                                                                                                                                                                                                                                                                                   |          |                               |                      |                               |                      |                               |          |                               |                      |                               |                      |                      |          |                      |                      |                                                                                                                                                                                                                                                                                                                                                                                                                                                                                                                                                     |  |      |     |          |                      |                      |          |                      |                      |          |                      |                      |          |                      |                      |          |                      |                      |
| Person 3 | <input type="text"/> night(s)                                                                                                                     |                                                                                                                                                                                                                                                                                                                                                                                                                                                                                                                                                     |                                                                                                                                                                 |                                                                                                                                                                 |          |                               |                      |                               |          |                               |                      |                               |                                                                                                                                                                                                                                                                                                                                                                                   |                      |                               |                      |                               |          |                               |                      |                                                                                                                                                                                                                                                                                                                                                                                                                                                                                                                                                     |          |                               |                                                                                                                                                                                                                                                                                                                                                                                   |          |                               |                      |                               |                      |                               |          |                               |                      |                               |                      |                      |          |                      |                      |                                                                                                                                                                                                                                                                                                                                                                                                                                                                                                                                                     |  |      |     |          |                      |                      |          |                      |                      |          |                      |                      |          |                      |                      |          |                      |                      |
| Person 4 | <input type="text"/> night(s)                                                                                                                     |                                                                                                                                                                                                                                                                                                                                                                                                                                                                                                                                                     |                                                                                                                                                                 |                                                                                                                                                                 |          |                               |                      |                               |          |                               |                      |                               |                                                                                                                                                                                                                                                                                                                                                                                   |                      |                               |                      |                               |          |                               |                      |                                                                                                                                                                                                                                                                                                                                                                                                                                                                                                                                                     |          |                               |                                                                                                                                                                                                                                                                                                                                                                                   |          |                               |                      |                               |                      |                               |          |                               |                      |                               |                      |                      |          |                      |                      |                                                                                                                                                                                                                                                                                                                                                                                                                                                                                                                                                     |  |      |     |          |                      |                      |          |                      |                      |          |                      |                      |          |                      |                      |          |                      |                      |
| Person 5 | <input type="text"/> night(s)                                                                                                                     |                                                                                                                                                                                                                                                                                                                                                                                                                                                                                                                                                     |                                                                                                                                                                 |                                                                                                                                                                 |          |                               |                      |                               |          |                               |                      |                               |                                                                                                                                                                                                                                                                                                                                                                                   |                      |                               |                      |                               |          |                               |                      |                                                                                                                                                                                                                                                                                                                                                                                                                                                                                                                                                     |          |                               |                                                                                                                                                                                                                                                                                                                                                                                   |          |                               |                      |                               |                      |                               |          |                               |                      |                               |                      |                      |          |                      |                      |                                                                                                                                                                                                                                                                                                                                                                                                                                                                                                                                                     |  |      |     |          |                      |                      |          |                      |                      |          |                      |                      |          |                      |                      |          |                      |                      |
| Person 1 | <input type="text"/> night(s)                                                                                                                     |                                                                                                                                                                                                                                                                                                                                                                                                                                                                                                                                                     |                                                                                                                                                                 |                                                                                                                                                                 |          |                               |                      |                               |          |                               |                      |                               |                                                                                                                                                                                                                                                                                                                                                                                   |                      |                               |                      |                               |          |                               |                      |                                                                                                                                                                                                                                                                                                                                                                                                                                                                                                                                                     |          |                               |                                                                                                                                                                                                                                                                                                                                                                                   |          |                               |                      |                               |                      |                               |          |                               |                      |                               |                      |                      |          |                      |                      |                                                                                                                                                                                                                                                                                                                                                                                                                                                                                                                                                     |  |      |     |          |                      |                      |          |                      |                      |          |                      |                      |          |                      |                      |          |                      |                      |
| Person 2 | <input type="text"/> night(s)                                                                                                                     |                                                                                                                                                                                                                                                                                                                                                                                                                                                                                                                                                     |                                                                                                                                                                 |                                                                                                                                                                 |          |                               |                      |                               |          |                               |                      |                               |                                                                                                                                                                                                                                                                                                                                                                                   |                      |                               |                      |                               |          |                               |                      |                                                                                                                                                                                                                                                                                                                                                                                                                                                                                                                                                     |          |                               |                                                                                                                                                                                                                                                                                                                                                                                   |          |                               |                      |                               |                      |                               |          |                               |                      |                               |                      |                      |          |                      |                      |                                                                                                                                                                                                                                                                                                                                                                                                                                                                                                                                                     |  |      |     |          |                      |                      |          |                      |                      |          |                      |                      |          |                      |                      |          |                      |                      |
| Person 3 | <input type="text"/> night(s)                                                                                                                     |                                                                                                                                                                                                                                                                                                                                                                                                                                                                                                                                                     |                                                                                                                                                                 |                                                                                                                                                                 |          |                               |                      |                               |          |                               |                      |                               |                                                                                                                                                                                                                                                                                                                                                                                   |                      |                               |                      |                               |          |                               |                      |                                                                                                                                                                                                                                                                                                                                                                                                                                                                                                                                                     |          |                               |                                                                                                                                                                                                                                                                                                                                                                                   |          |                               |                      |                               |                      |                               |          |                               |                      |                               |                      |                      |          |                      |                      |                                                                                                                                                                                                                                                                                                                                                                                                                                                                                                                                                     |  |      |     |          |                      |                      |          |                      |                      |          |                      |                      |          |                      |                      |          |                      |                      |
| Person 4 | <input type="text"/> night(s)                                                                                                                     |                                                                                                                                                                                                                                                                                                                                                                                                                                                                                                                                                     |                                                                                                                                                                 |                                                                                                                                                                 |          |                               |                      |                               |          |                               |                      |                               |                                                                                                                                                                                                                                                                                                                                                                                   |                      |                               |                      |                               |          |                               |                      |                                                                                                                                                                                                                                                                                                                                                                                                                                                                                                                                                     |          |                               |                                                                                                                                                                                                                                                                                                                                                                                   |          |                               |                      |                               |                      |                               |          |                               |                      |                               |                      |                      |          |                      |                      |                                                                                                                                                                                                                                                                                                                                                                                                                                                                                                                                                     |  |      |     |          |                      |                      |          |                      |                      |          |                      |                      |          |                      |                      |          |                      |                      |
| Person 5 | <input type="text"/> night(s)                                                                                                                     |                                                                                                                                                                                                                                                                                                                                                                                                                                                                                                                                                     |                                                                                                                                                                 |                                                                                                                                                                 |          |                               |                      |                               |          |                               |                      |                               |                                                                                                                                                                                                                                                                                                                                                                                   |                      |                               |                      |                               |          |                               |                      |                                                                                                                                                                                                                                                                                                                                                                                                                                                                                                                                                     |          |                               |                                                                                                                                                                                                                                                                                                                                                                                   |          |                               |                      |                               |                      |                               |          |                               |                      |                               |                      |                      |          |                      |                      |                                                                                                                                                                                                                                                                                                                                                                                                                                                                                                                                                     |  |      |     |          |                      |                      |          |                      |                      |          |                      |                      |          |                      |                      |          |                      |                      |

Interviewer Code: \_\_\_\_\_

**Baseline Malaria Diagnostic Results. (To be completed for each subject.)**Endemicity-Village-Household ID: 

|  |  |  |  |  |  |
|--|--|--|--|--|--|
|  |  |  |  |  |  |
|--|--|--|--|--|--|

Participant Name: 

|  |
|--|
|  |
|--|

Participant Age: 

|  |
|--|
|  |
|--|

Participant Number: 

|  |  |
|--|--|
|  |  |
|--|--|

**BASELINE MALARIA QUESTIONS**

1. In the last 6 months has the participant been diagnosed with malaria by the Health Center or Hospital?

|    |    |           |    |                     |    |            |    |         |    |
|----|----|-----------|----|---------------------|----|------------|----|---------|----|
| No | 00 | Yes, once | 01 | Yes, more than once | 02 | Don't know | 98 | Refused | 99 |
|----|----|-----------|----|---------------------|----|------------|----|---------|----|

2. In the last 6 months, has the participant been treated with an antimalarial medicine?

|    |    |     |    |            |    |         |    |
|----|----|-----|----|------------|----|---------|----|
| No | 00 | Yes | 01 | Don't know | 98 | Refused | 99 |
|----|----|-----|----|------------|----|---------|----|

2a. If so, which one:

|             |    |                                                                                              |    |            |    |            |    |
|-------------|----|----------------------------------------------------------------------------------------------|----|------------|----|------------|----|
| None        | 00 | Artemisinin-based combination therapy (ACT): artesunate/amodiaquine, artémether/lumefantrine | 05 | Malaxin    | 07 | N/A        | 96 |
| SP/Fansidar | 01 |                                                                                              |    | Malaritab  | 08 | Other      | 97 |
| Chloroquine | 02 |                                                                                              |    | Arinate    | 09 | Don't know | 98 |
| Amodiaquine | 03 | Other ACT: arsucam/ co-arinate, etc.                                                         | 06 | Artesunate | 10 | Refused    | 99 |
| Quinine     | 04 |                                                                                              |    | Mefloquine | 11 |            |    |

If other, please list: \_\_\_\_\_

3. In the past week, has the participant had a fever?

|    |    |     |    |            |    |         |    |
|----|----|-----|----|------------|----|---------|----|
| No | 00 | Yes | 01 | Don't know | 98 | Refused | 99 |
|----|----|-----|----|------------|----|---------|----|

3a. If a thermometer was used, what was the temperature?

|  |    |     |    |            |    |         |    |
|--|----|-----|----|------------|----|---------|----|
|  | °C | N/A | 96 | Don't know | 98 | Refused | 99 |
|--|----|-----|----|------------|----|---------|----|

4. Is participant pregnant?

|    |    |     |    |     |    |            |    |         |    |
|----|----|-----|----|-----|----|------------|----|---------|----|
| No | 00 | Yes | 01 | N/A | 96 | Don't know | 98 | Refused | 99 |
|----|----|-----|----|-----|----|------------|----|---------|----|

4a. If yes to Q7, is an antimalarial being taken for malaria prevention?

|    |    |                    |    |                         |    |     |    |            |    |         |    |
|----|----|--------------------|----|-------------------------|----|-----|----|------------|----|---------|----|
| No | 00 | Yes, SP (Fansidar) | 01 | Yes, other antimalarial | 02 | N/A | 96 | Don't know | 98 | Refused | 99 |
|----|----|--------------------|----|-------------------------|----|-----|----|------------|----|---------|----|

If other, please list: \_\_\_\_\_

**BLOOD TESTS**Collection date and time: 

|  |  |
|--|--|
|  |  |
|--|--|

 - 

|  |  |
|--|--|
|  |  |
|--|--|

 - 

|  |  |  |  |
|--|--|--|--|
|  |  |  |  |
|--|--|--|--|

|  |  |
|--|--|
|  |  |
|--|--|

 : 

|  |  |
|--|--|
|  |  |
|--|--|

  
day month year hours minutes

5. Was a rapid diagnostic test performed?

|    |    |     |    |
|----|----|-----|----|
| No | 00 | Yes | 01 |
|----|----|-----|----|

If no, please state reason: \_\_\_\_\_

5a. If yes to Q5, rapid diagnostic test results:

|          |    |                                   |    |                                                        |    |                              |    |               |    |     |    |
|----------|----|-----------------------------------|----|--------------------------------------------------------|----|------------------------------|----|---------------|----|-----|----|
| Negative | 00 | Positive for <i>P. falciparum</i> | 01 | Positive for a species other than <i>P. falciparum</i> | 02 | Positive for mixed infection | 03 | Indeterminate | 04 | N/A | 96 |
|----------|----|-----------------------------------|----|--------------------------------------------------------|----|------------------------------|----|---------------|----|-----|----|

If indeterminate, please state reason: \_\_\_\_\_

5b. If positive, referred to Health Clinic?

|    |    |     |    |
|----|----|-----|----|
| No | 00 | Yes | 01 |
|----|----|-----|----|

If no, please state reason: \_\_\_\_\_

Interviewer Code: \_\_\_\_\_

## Baseline Malaria Diagnostic Results. (Continued)

Endemicity-Village-Household ID:

|  |  |  |  |  |  |
|--|--|--|--|--|--|
|  |  |  |  |  |  |
|--|--|--|--|--|--|

Participant Name:

|  |
|--|
|  |
|--|

Participant Age:

|  |
|--|
|  |
|--|

Participant Number:

|  |  |
|--|--|
|  |  |
|--|--|

6. Was a dried blood spot (DBS) collected?

|    |    |     |    |
|----|----|-----|----|
| No | 00 | Yes | 01 |
|----|----|-----|----|

If no, please state reason: \_\_\_\_\_

7. The filter paper must be labeled with the 8-digit code (household ID followed by subject number).

I have checked to make sure the filter paper number is correct.

|    |    |     |    |
|----|----|-----|----|
| No | 00 | Yes | 01 |
|----|----|-----|----|

If no, please state reason: \_\_\_\_\_

## SIGNATURES

Lab technician: \_\_\_\_\_

Interviewer: \_\_\_\_\_

Interviewer Code: \_\_\_\_\_
